# Supplementary material for: MRSD: a novel quantitative approach for assessing suitability of RNA-seq in the clinical investigation of mis-splicing in Mendelian disease
Source: bioRxiv or medRxiv preprint supplement (doi:10.1101/2021.03.19.21253973), 2021-03-20
Supplement: Supplementary file [file media-1.pdf]

# MRSD: a novel quantitative approach for assessing the suitability of RNA-seq in the clinical investigation of mis-splicing in Mendelian disease

## Supplementary Material

|                                                                                                             |    |
|-------------------------------------------------------------------------------------------------------------|----|
| <b>Supplementary Table 1</b>                                                                                |    |
| Summary of pathogenic splicing variants analyzed during this study                                          | 3  |
| <b>Supplementary Table 2</b>                                                                                |    |
| Summary of datasets used in this study                                                                      | 4  |
| <b>Supplementary Figure 1</b>                                                                               |    |
| Categories of potentially pathogenic splicing events and their representation in analytical pipeline output | 5  |
| <b>Supplementary Figure 2</b>                                                                               |    |
| Sequencing depths of RNA-seq samples used for evaluation of MRSD model accuracy                             | 6  |
| <b>Supplementary Figure 3</b>                                                                               |    |
| Effect of varying sequencing read length on MRSD model performance                                          | 7  |
| <b>Supplementary Figure 4</b>                                                                               |    |
| Evidence for 3' sequencing bias confounding the use of TPM as a guiding RNA-seq metric                      | 8  |
| <b>Supplementary Figure 5</b>                                                                               |    |
| Exemplar events identified during pathogenic splice event analysis                                          | 9  |
| <b>Supplementary Figure 6</b>                                                                               |    |
| Relative gene expression level does not reflect the raw read coverage of transcript splice junctions        | 10 |
| <b>Supplementary Figure 7</b>                                                                               |    |
| Pairwise comparisons, by tissue, of MRSD scores for PanelApp disease genes                                  | 11 |
| <b>Supplementary Figure 8</b>                                                                               |    |
| Proportion of low-MRSD genes per tissue for all PanelApp panels, ordered by panel size                      |    |
| <b>a) Low-MRSD gene proportions for large panels (&gt; 50 genes)</b>                                        | 12 |
| <b>b) Low-MRSD gene proportions for medium panels (21-50 genes)</b>                                         | 13 |
| <b>c) Low-MRSD gene proportions for small panels (11-20 genes)</b>                                          | 14 |
| <b>d) Low-MRSD gene proportions for very small panels (<math>\leq 10</math> genes)</b>                      | 15 |

## **Supplementary Figure 9**

Proportion of low-MRSD genes per tissue for all PanelApp panels, ordered alphabetically by panel name

|                                                          |    |
|----------------------------------------------------------|----|
| <b>a) Low-MRSD gene proportions for panels named A-E</b> | 16 |
| <b>b) Low-MRSD gene proportions for panels named F-L</b> | 17 |
| <b>c) Low-MRSD gene proportions for panels named M-X</b> | 18 |

## **Supplementary Figure 10**

The potential power of RNA-seq for resolving ClinVar variants of uncertain significance (VUSs) 19

## **Supplementary Methods 1**

Illustration of MRSD calculation methodology 20

## **Supplementary Methods 2**

Tiering methodology for selection of transcripts for MRSD generation 21

## **Supplementary Methods 3**

Tissue-specific criteria for filtering of high-quality GTEx control RNA-seq datasets 22

## **Supplementary Methods 4**

Sample IDs of GTEx samples used to generate control datasets

|                                           |    |
|-------------------------------------------|----|
| <b>Skeletal muscle</b>                    | 23 |
| <b>Whole blood</b>                        | 25 |
| <b>EBV-transformed lymphocytes (LCLs)</b> | 27 |
| <b>Cultured fibroblasts</b>               | 28 |

**References** 30

| Variant (HGVSg)                  | Gene    | Source of RNA   | Phenotype                              | TPM    | MRSD (M reads) |
|----------------------------------|---------|-----------------|----------------------------------------|--------|----------------|
| chr2:152,355,017G>T              | NEB     |                 | Nemaline myopathy                      | 857.9  | 9.83           |
| chr2:152,389,953A>C              |         |                 |                                        |        |                |
| chr2:152,544,805C>T              |         |                 |                                        |        |                |
| chrX:31,790,694-31,798,498invdel | DMD     | Skeletal muscle | Duchenne muscular dystrophy            | 24.84  | 79.4           |
| chrX:32,274,692G>A               |         |                 | Myalgia, myoglobinuria                 |        |                |
| chr2:179,642,185G>A              | TTN     | Skeletal muscle | Multi/minicore congenital myopathy     | 349.5  | 47.63          |
| chr21:47,409,881C>T              | COL6A1  |                 | Collagen VI-related dystrophy          | 56.02  | 16.25          |
| chr21:47,409,881C>T              |         |                 |                                        |        |                |
| chr19:38,958,362C>T              | RYR1    |                 | Congenital fiber-type disproportion    | 425.5  | 3.45           |
| chr1:46,655,129C>A               | POMGNT1 |                 | $\alpha$ -Dystroglycanopathy           | 29.26  | 6.01           |
| chr17:41,199,655C>G              | BRCA1   | LCL             | Inherited breast cancer susceptibility | 19.985 | 217.19         |
| chr17:41,246,879T>C              |         |                 |                                        |        |                |
| chr17:41,246,879T>C              |         |                 |                                        |        |                |
| chr17:41,246,879T>C              |         |                 |                                        |        |                |
| chr17:41,258,551C>A              | BRCA2   |                 |                                        | 10.16  | Unfeasible     |
| chr13:32,945,238G>A              |         |                 |                                        |        |                |
| chr13:32,969,074A>T              |         |                 |                                        |        |                |
| chr19:33,892,776C>T              | PEPD    |                 | Prolidase deficiency                   | 18.89  | 28.31          |
| chr20:35,526,363C>G              | SAMHD1  | Whole blood     | Aicardi-Goutières syndrome             | 48.53  | 24.68          |
| chr23:153,997,595G>A             | DKC1    |                 | Dyskeratosis congenita                 | 102.01 | 8.59           |

**Supplementary Table 1.** Summary of pathogenic splicing events analyzed in this study. All co-ordinates are given in relation to the GRCh37 genome build. TPM, transcripts per million; MRSD, minimum required sequencing depth.

| Tissue | No. samples | Source                        | Sequencing type                               | Usage                                                                                                        |
|--------|-------------|-------------------------------|-----------------------------------------------|--------------------------------------------------------------------------------------------------------------|
| Blood  | 151         | GTEx                          | 75-bp paired end poly-A enrichment, Illumina  | Generation of MRSD model, bootstrapping analysis of event counts                                             |
| LCL    | 91          |                               |                                               |                                                                                                              |
| Muscle | 184         |                               |                                               |                                                                                                              |
| Blood  | 1           | Inhouse                       | 150-bp paired end globin depletion, Illumina  | Collation of known pathogenic mis-splicing events                                                            |
|        | 12          |                               | 75-bp paired end poly-A enrichment, Illumina  | Collation of known pathogenic mis-splicing events & MRSD model validation                                    |
| LCL    | 20          |                               | 150-bp paired end poly-A enrichment, Illumina | Collation of known pathogenic mis-splicing events                                                            |
|        | 4           |                               | 75-bp paired end poly-A enrichment, Illumina  | MRSD model validation                                                                                        |
| Muscle | 52          | Previously published data [1] | 75-bp paired end poly-A enrichment, Illumina  | Collation of known pathogenic mis-splicing events, downsampling of pathogenic events & MRSD model validation |

**Supplementary Table 2.** *Summary of RNA-seq datasets utilized in this study.* RNA-seq datasets derived using different methodologies were used for various aspects of this study. All data used to generate the MRSD model was based on data from the GTEx consortium across all three analyzed tissues.

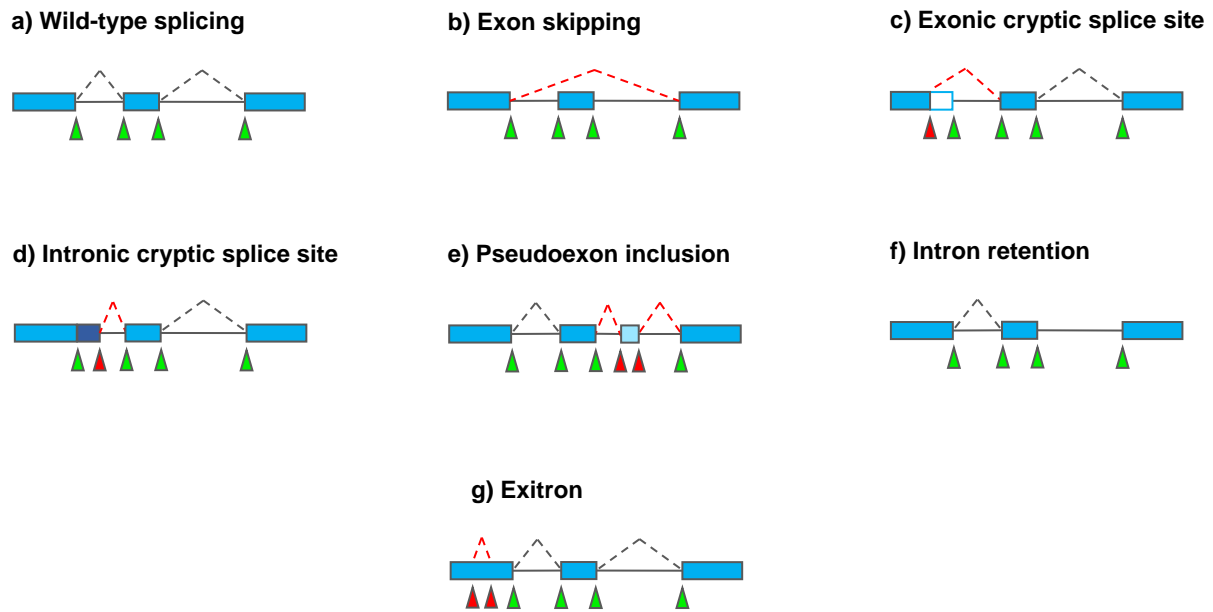

**Supplementary Figure 1.** *Categories of potentially pathogenic splicing events and their representation in analytical pipeline output.* Disruption of (a) wild-type splicing may lead to (b) skipping of one or more exons, the creation of novel splice sites in (c) exonic or (d) intronic regions that may outcompete the canonical sites, or result in (e) the generation of an intronic pseudoexon. (f) Splicing may be abrogated completely, leading to total retention of the intron. (g) Within longer exons, creation of a novel splice site may lead to a so-called “exitron”, whereby a central portion of the exon is absent from the final transcript. Green triangles indicate canonical splice sites; red triangles indicate non-canonical sites.

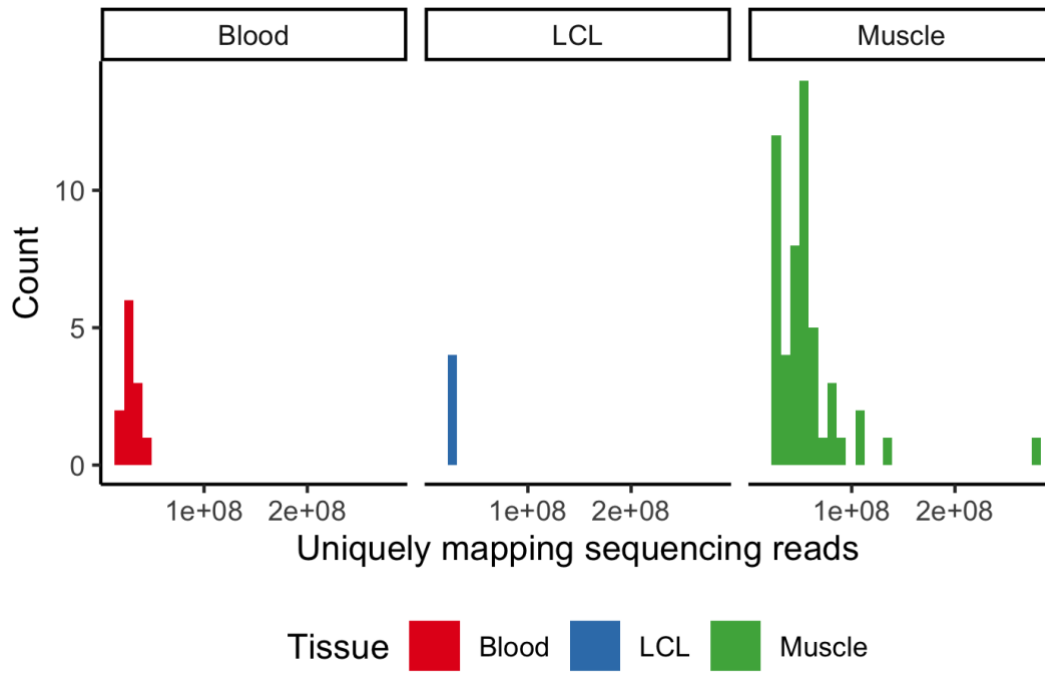

**Supplementary Figure 2.** Sequencing depths of RNA-seq samples used for evaluation of MRSD model accuracy. Whole blood ( $n = 12$ ), LCL ( $n = 4$ ) and skeletal muscle ( $n = 52$ ) RNA-seq samples were derived from in-house or previously published data [1] for validation of the MRSD model efficacy. Sequencing depths across the three tissues ranged from 20.6-281.5 M uniquely mapping reads.

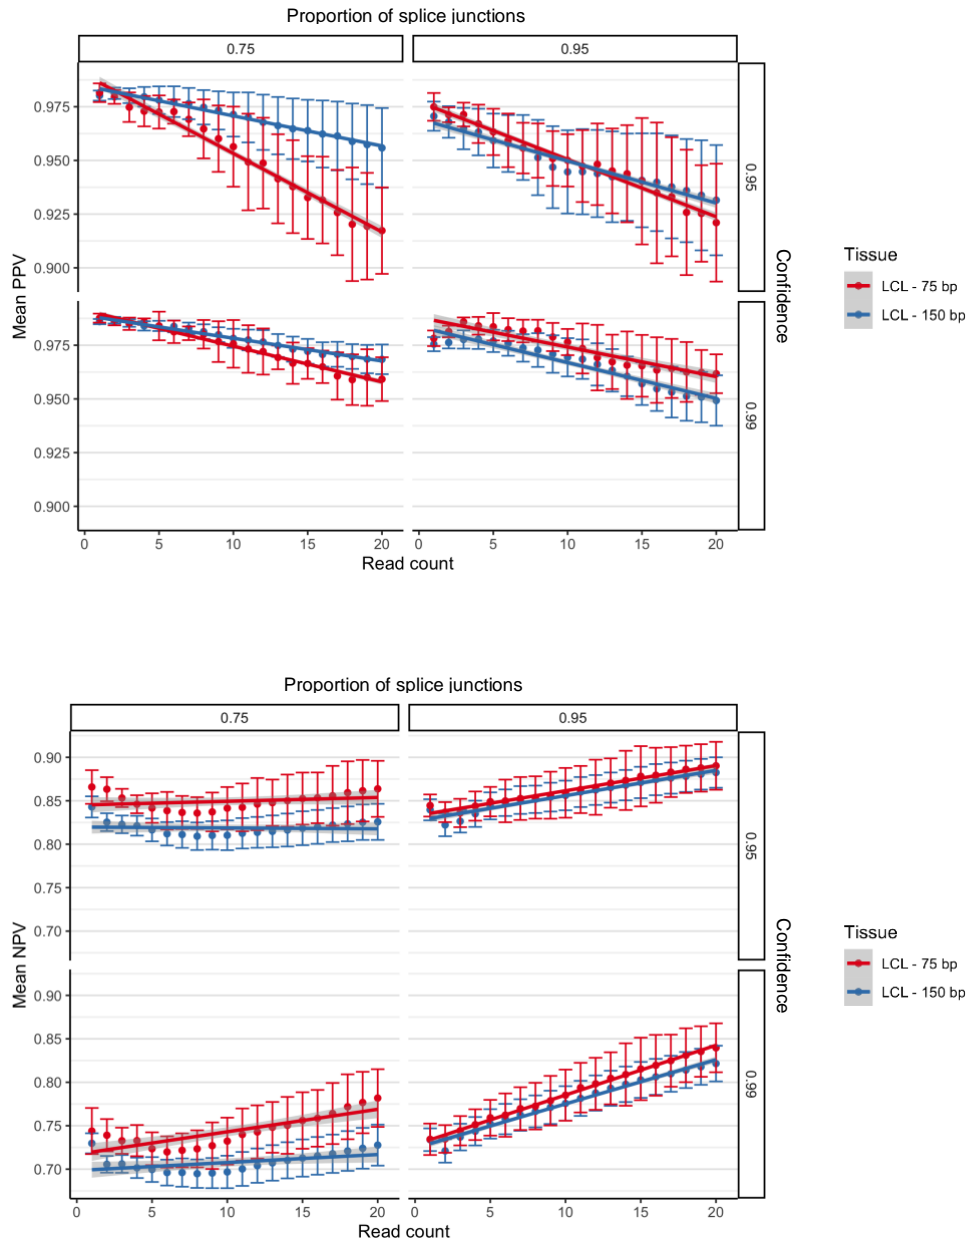

**Supplementary Figure 3. Effect of varying sequencing read length on MRSD model performance.** Despite being derived from 75 bp paired end RNA-seq data, MRSD scores show similar performance when applied to 75 or 150 bp paired end read-based RNA-seq, both in terms of (top) PPV and (bottom) NPV. When specifying 75% splice junction coverage, MRSD PPV is generally higher when the model is applied to 150 bp read-based data. This likely reflects the fact that junctions predicted to be sufficiently covered by 75 bp reads will be more likely to be sufficiently covered by reads of greater length, and so positive predictions are more likely to hold true when applied to longer-read data. We also observe that NPV for 150 bp read datasets is lower than that for 75 bp across all 4 parameter combinations; conversely to PPV, this is possibly because transcripts not sufficiently covered by 75 bp reads are more likely to be sufficiently covered by 150 bp reads, thus making negative predictions less likely to hold true in longer-read data. In most cases, differences in model performance between 75 and 150 bp is low, suggesting MRSD may, in some cases, provide a suitable approximation of transcript coverage in RNA-seq datasets with read lengths different to those used to construct the model.

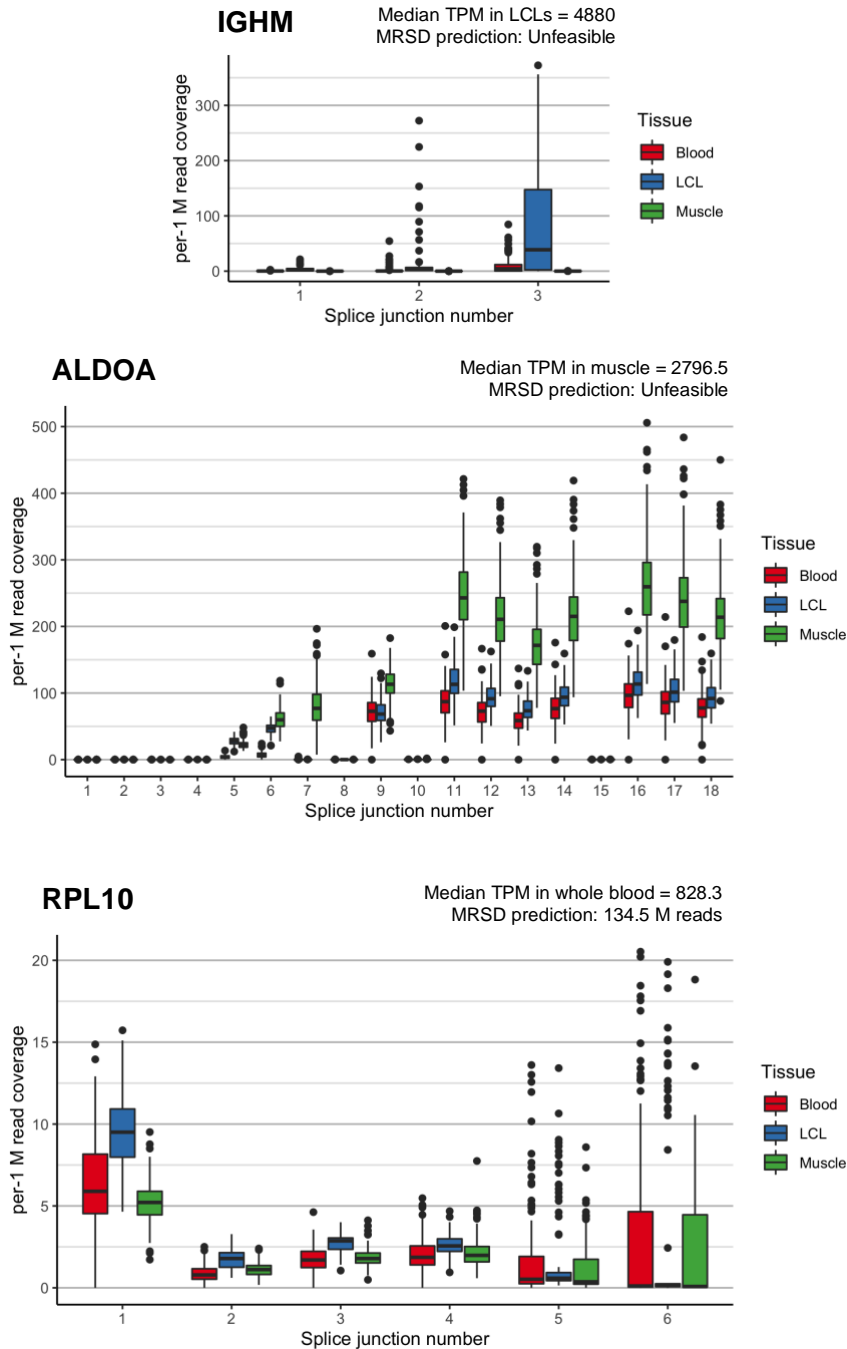

**Supplementary Figure 4. Evidence for 3' sequence bias confounding the use of TPM as a guiding RNA-seq metric.** Analysing the number of reads (per 1 M uniquely mapping input reads) mapping to individual splice junctions within three genes with substantial TPM-MRSD discrepancy demonstrates that highly expressed genes may exhibit biased coverage of splice junctions. For IGHM (top) and ALDOA (middle) in LCLs and muscle, respectively, a sufficient proportion of junctions towards the 3' end of the transcript have no read support in a sufficient number of patients, resulting in an MRSD prediction of "unfeasible", despite high coverage of other junctions within the same transcript. Coverage of the final two splice junctions in RPL10 (bottom) in LCL-based RNA-seq data is low but not non-zero in many patients, giving a feasible but high MRSD prediction. In some cases, this bias may result from artefacts of library preparation, or may possible reflect genuine isoform shifts in the given tissue. Higher splice junction numbers represent junctions closer to the 3' end of transcripts.



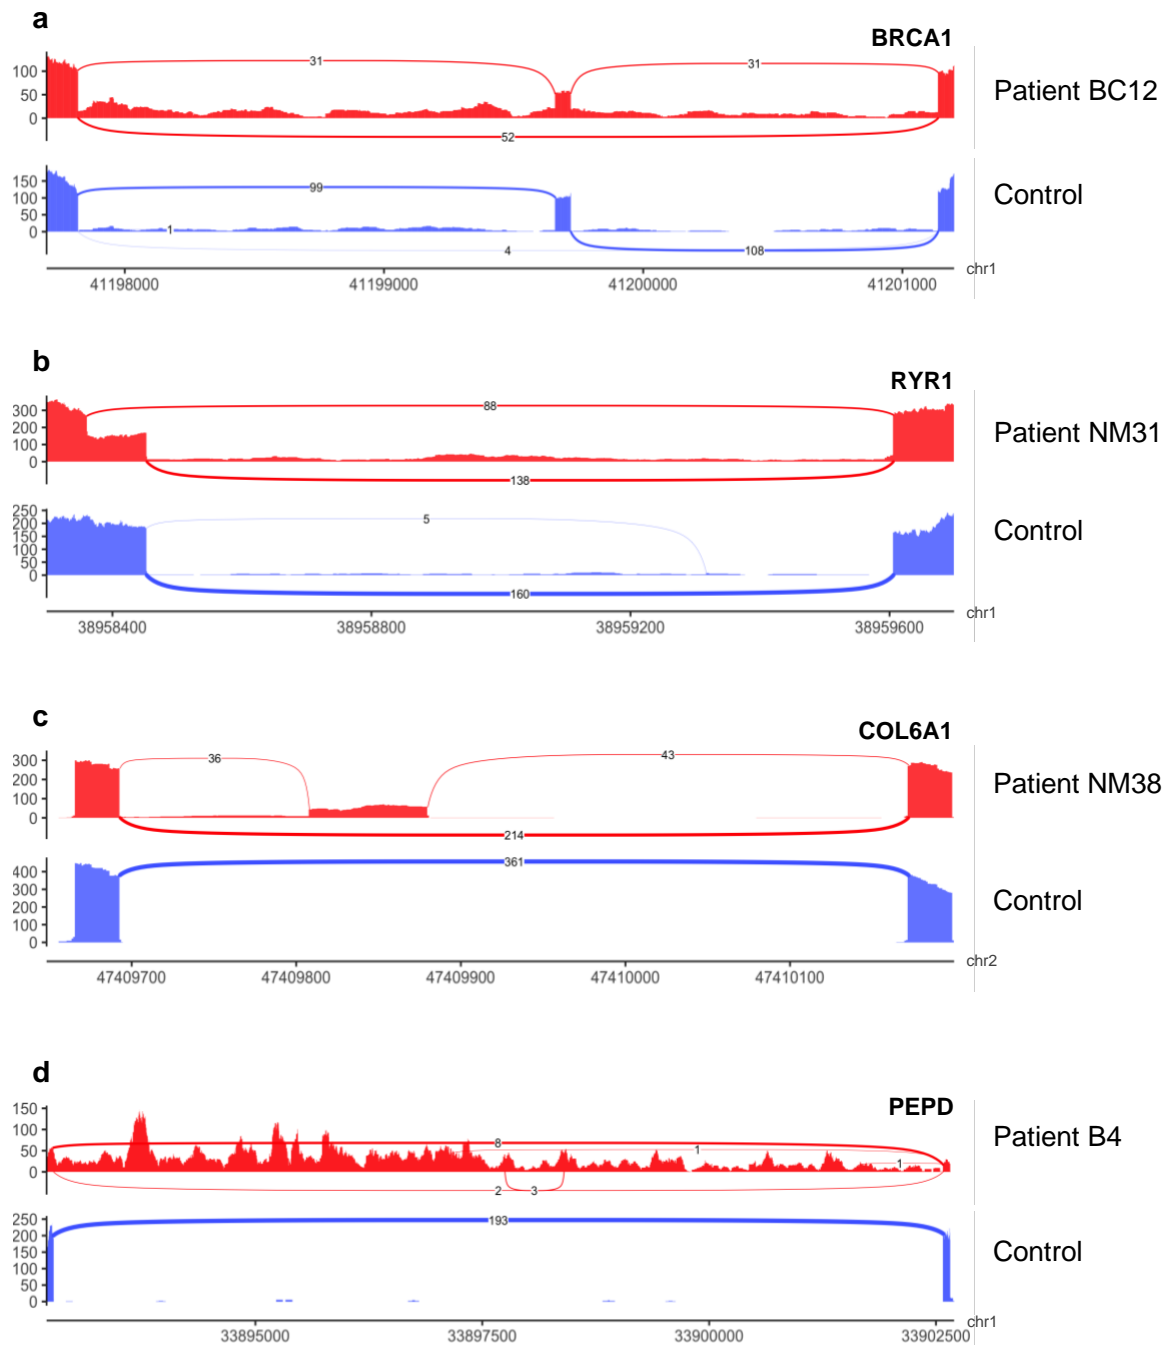

**Supplementary Figure 5.** Exemplar events identified during pathogenic splice event analysis. Selected Sashimi plots for (a) exon skipping, (b) exonic splice gain, (c) pseudoexonization and (d) intron retention events identified as the cause of disease in our patient datasets. The presence of aberrant splice junctions with outlying event metrics allowed flagging of these as potentially pathogenic. For (d), the intron retention event was identified from the 2 reads supporting usage of an extremely weak alternative splice acceptor four bases downstream of the abrogated canonical acceptor; however, in the absence of any aberrant splicing events, intron retention events are more difficult to identify from RNA-seq data using current bioinformatics pipelines.

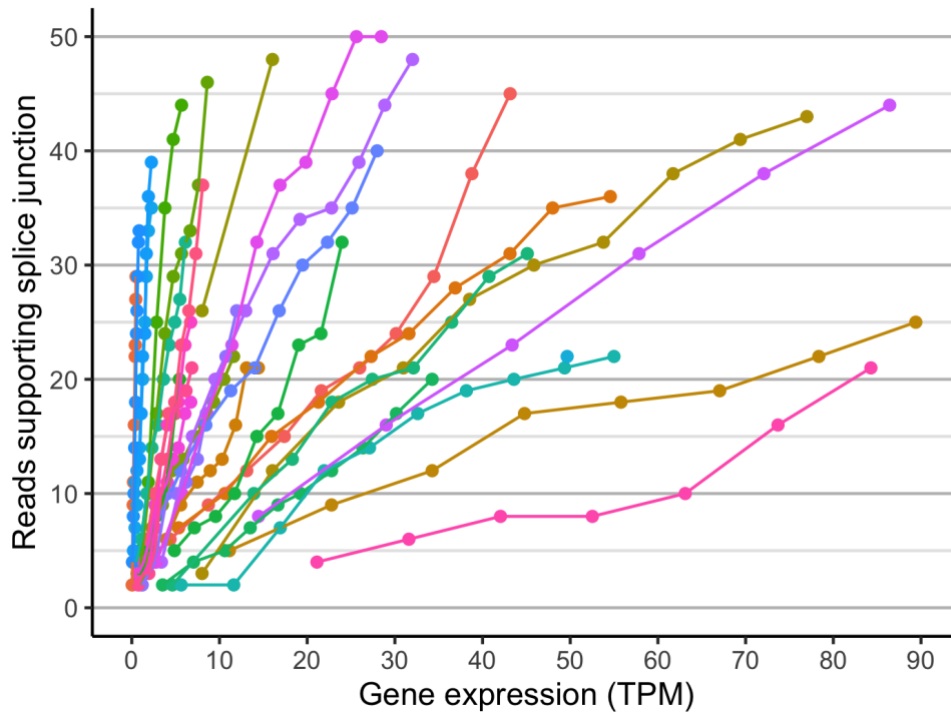

**Supplementary Figure 6.** *Relative gene expression level does not reflect the raw read coverage of transcript splice junctions.* When simulating decreased gene expression by downsampling reads in genes containing novel splicing events identified in upstream analysis, it emerged that expression of a gene (in transcripts per million, TPM) does not directly correlate with the number of reads supporting splice junctions in that gene. Among the events supported by 8 reads, for example, gene expression ranged from 0.17-52 TPM. This may be accounted for by variation in the proportion of transcripts containing the event, variation in the coverage across the length of a transcript (as shown in Supplementary Figure 4), or variation in the depth to which a sample has been sequenced. Thus, when specifying a metric threshold above which we expect splice aberration to be observable, relative expression level may not appropriately represent expected read support. Axes are limited for ease of visualization.

**Supplementary Figure 7.** Pairwise comparisons, by tissue, of predicted MRSD scores for PanelApp disease genes.

**a) MRSD predictions in muscle vs. blood**

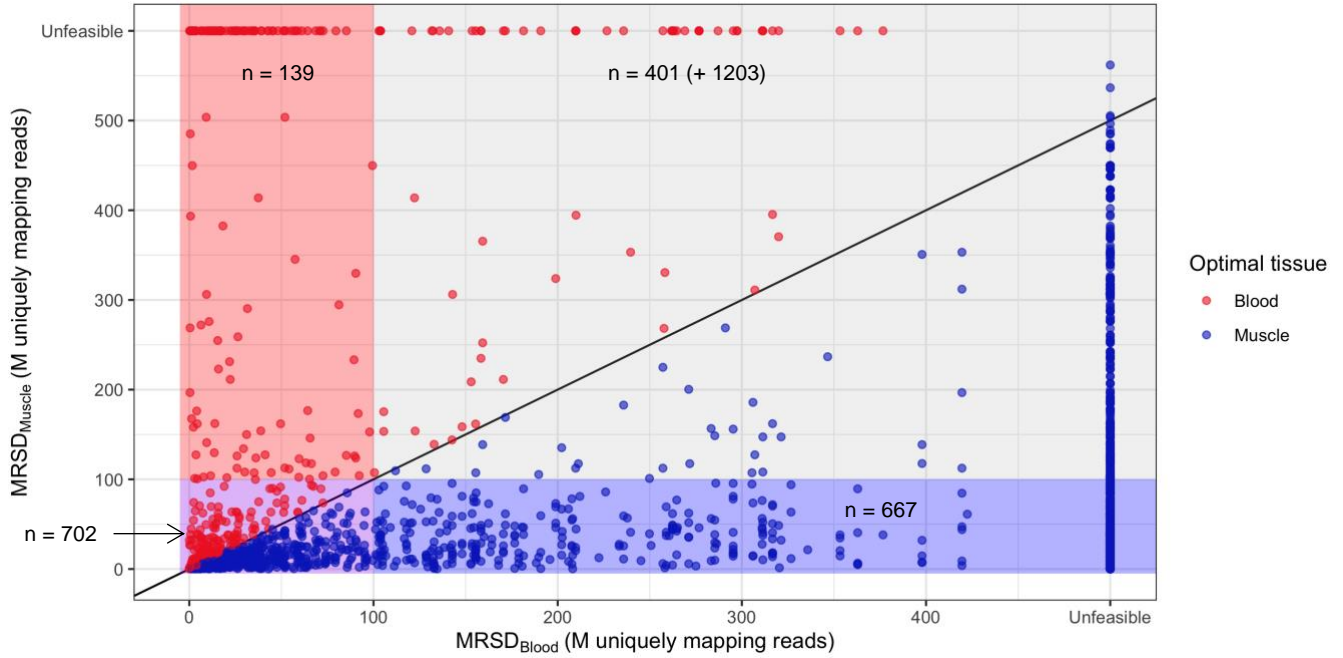

**b) MRSD predictions in LCLs vs. muscle**

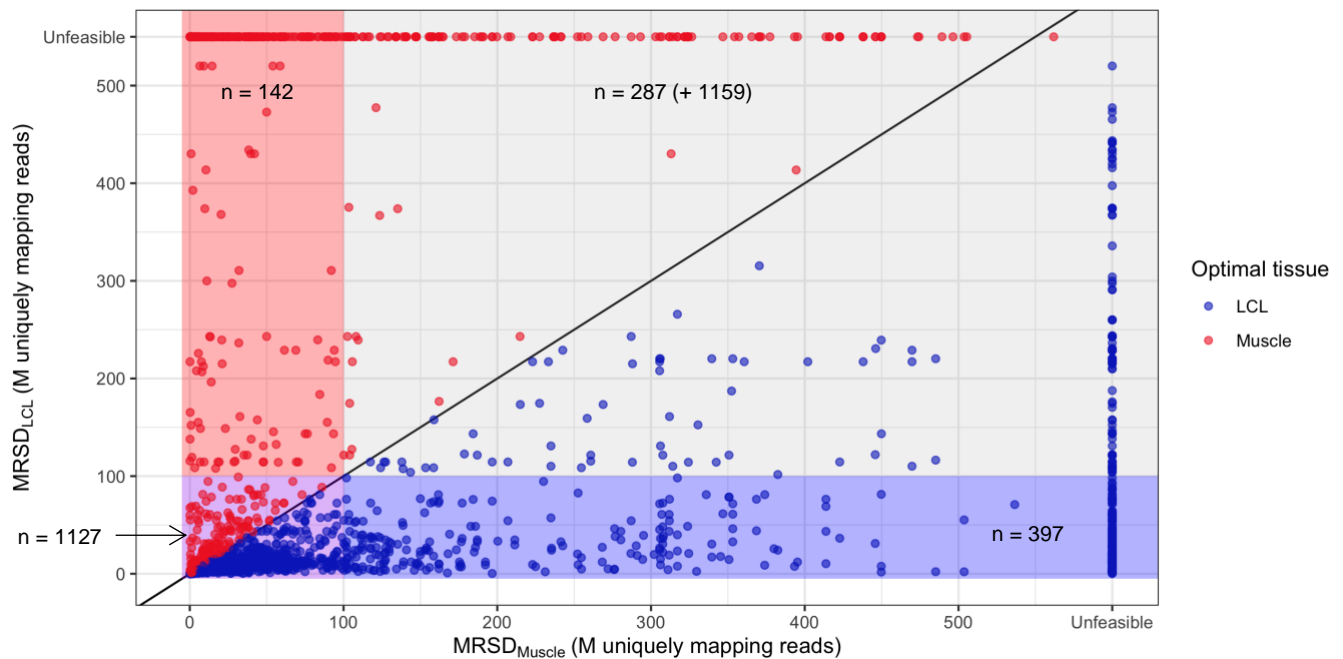

**Supplementary Figure 8.** Proportion of low-MRSD genes per tissue for all PanelApp panels, ordered by panel size.

**a) Low-MRSD gene proportions for large panels (> 50 genes)**

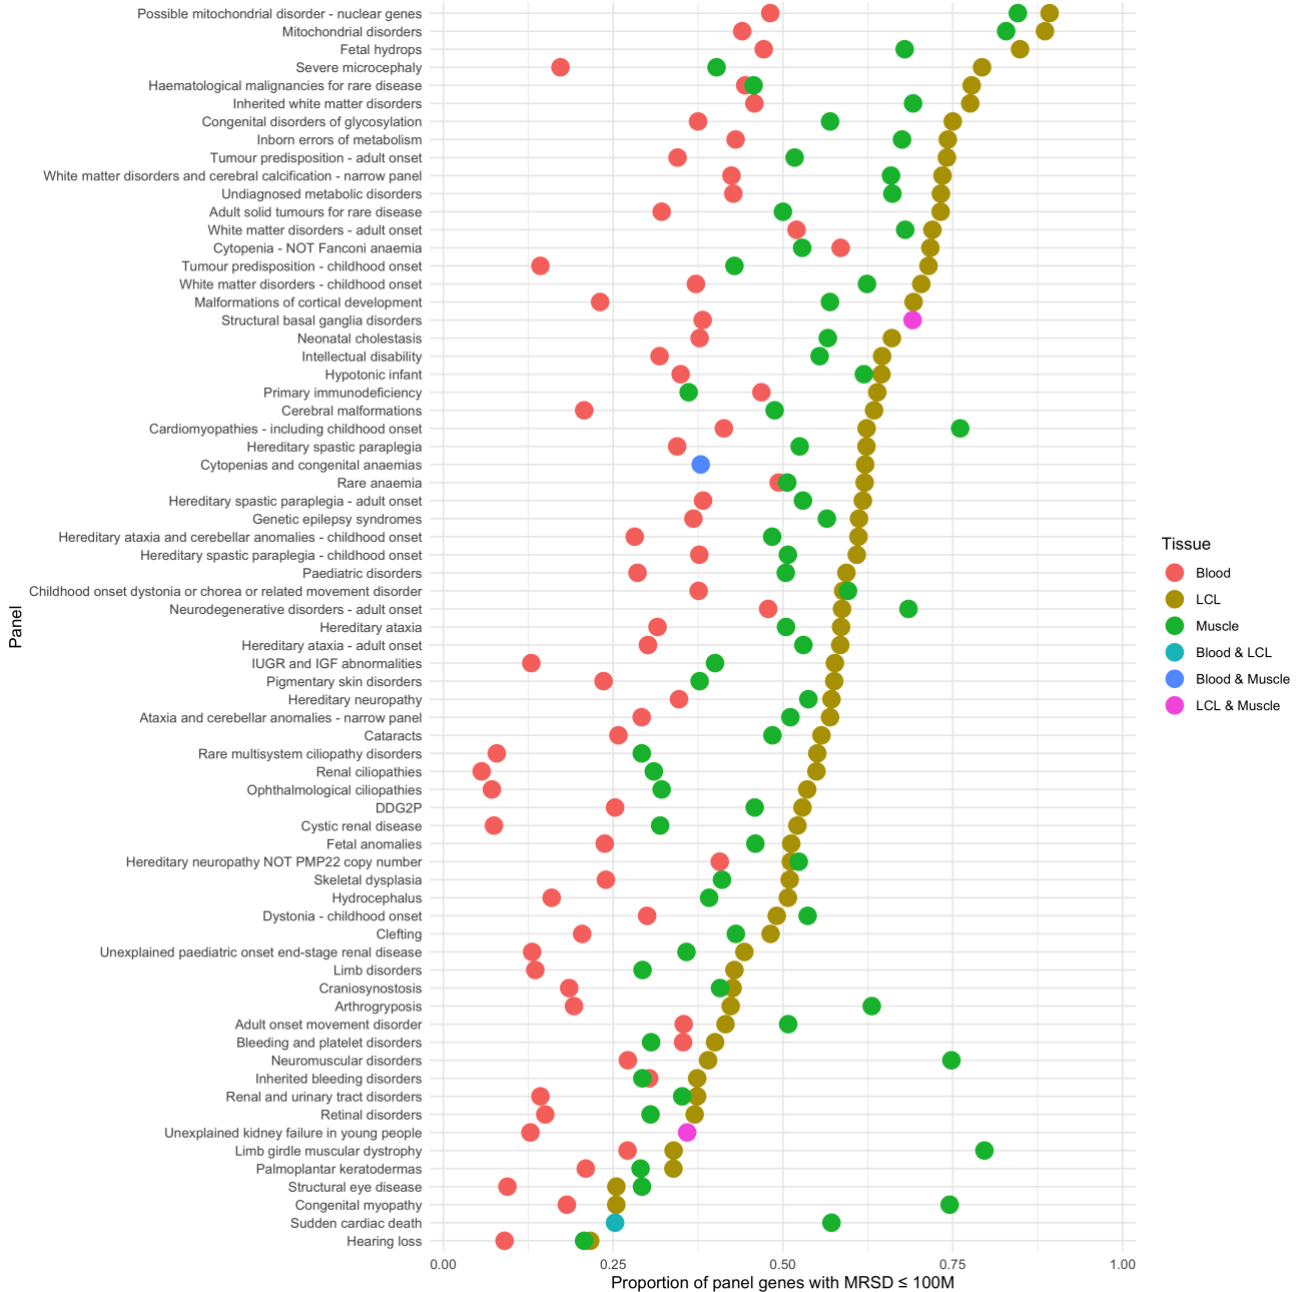

## b) Low-MRSD gene proportions for medium panels (21-50 genes)

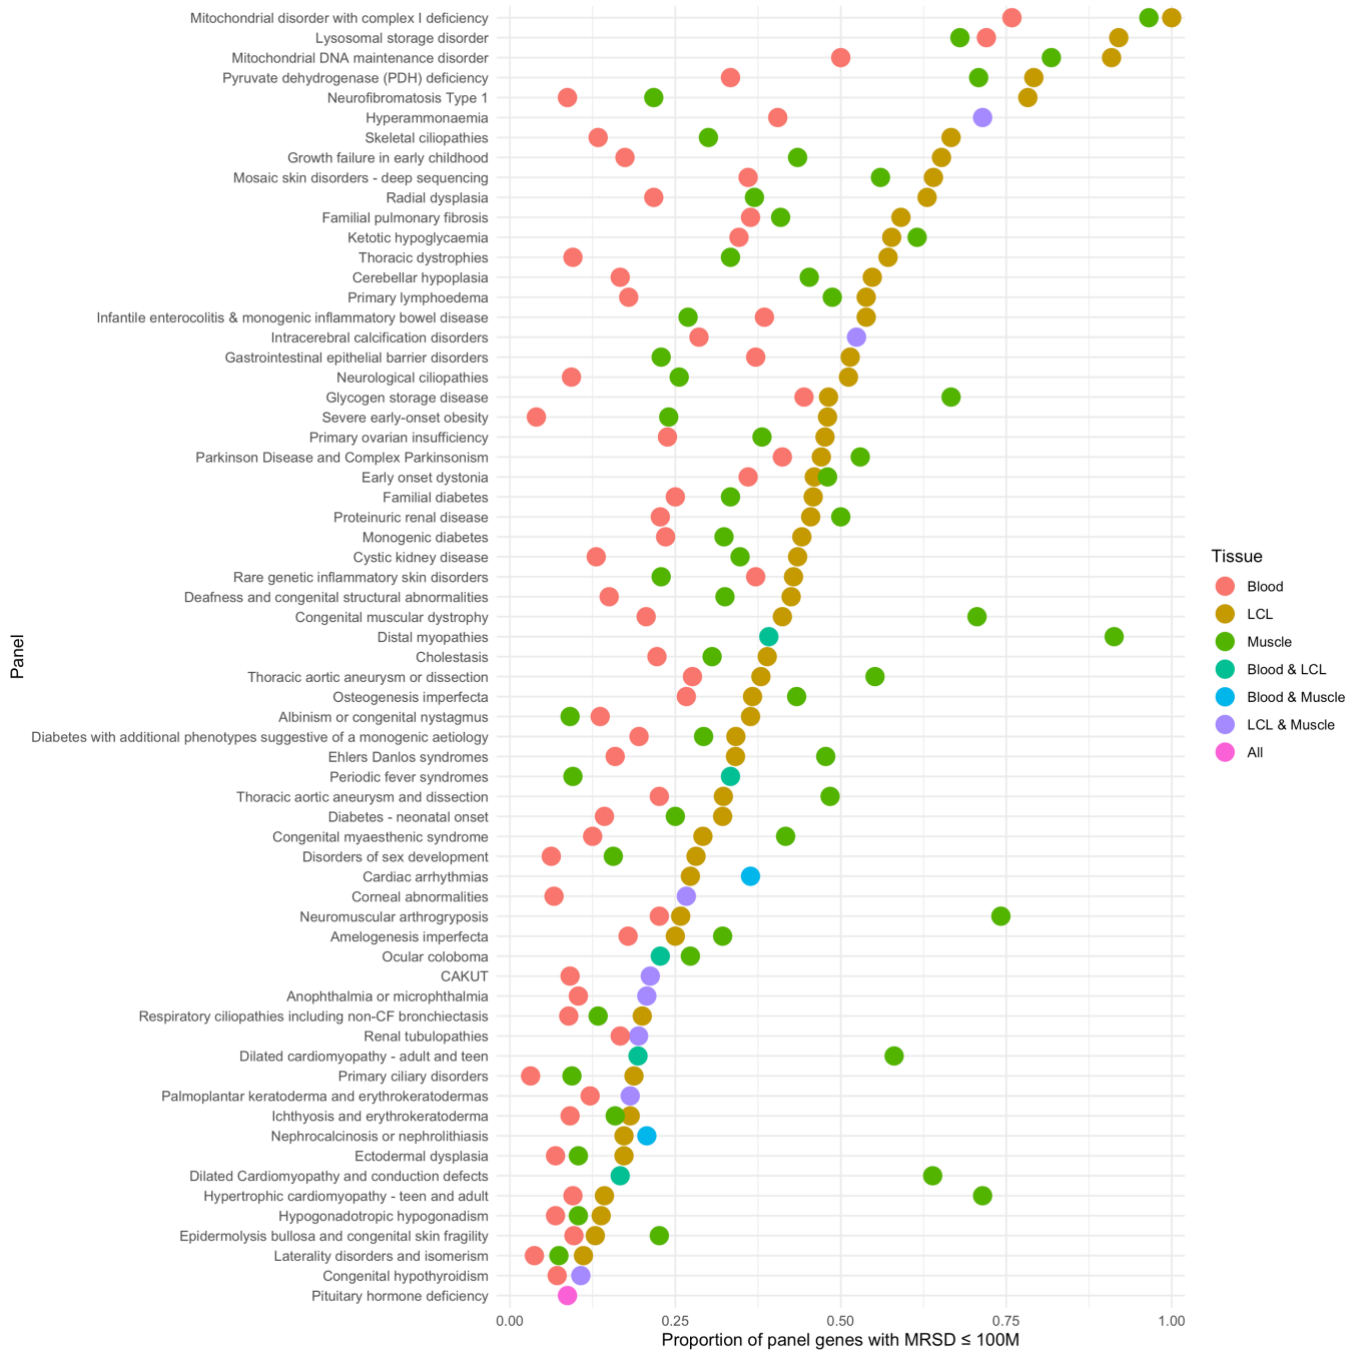

### c) Low-MRSD proportions for small panels (11-20 genes)

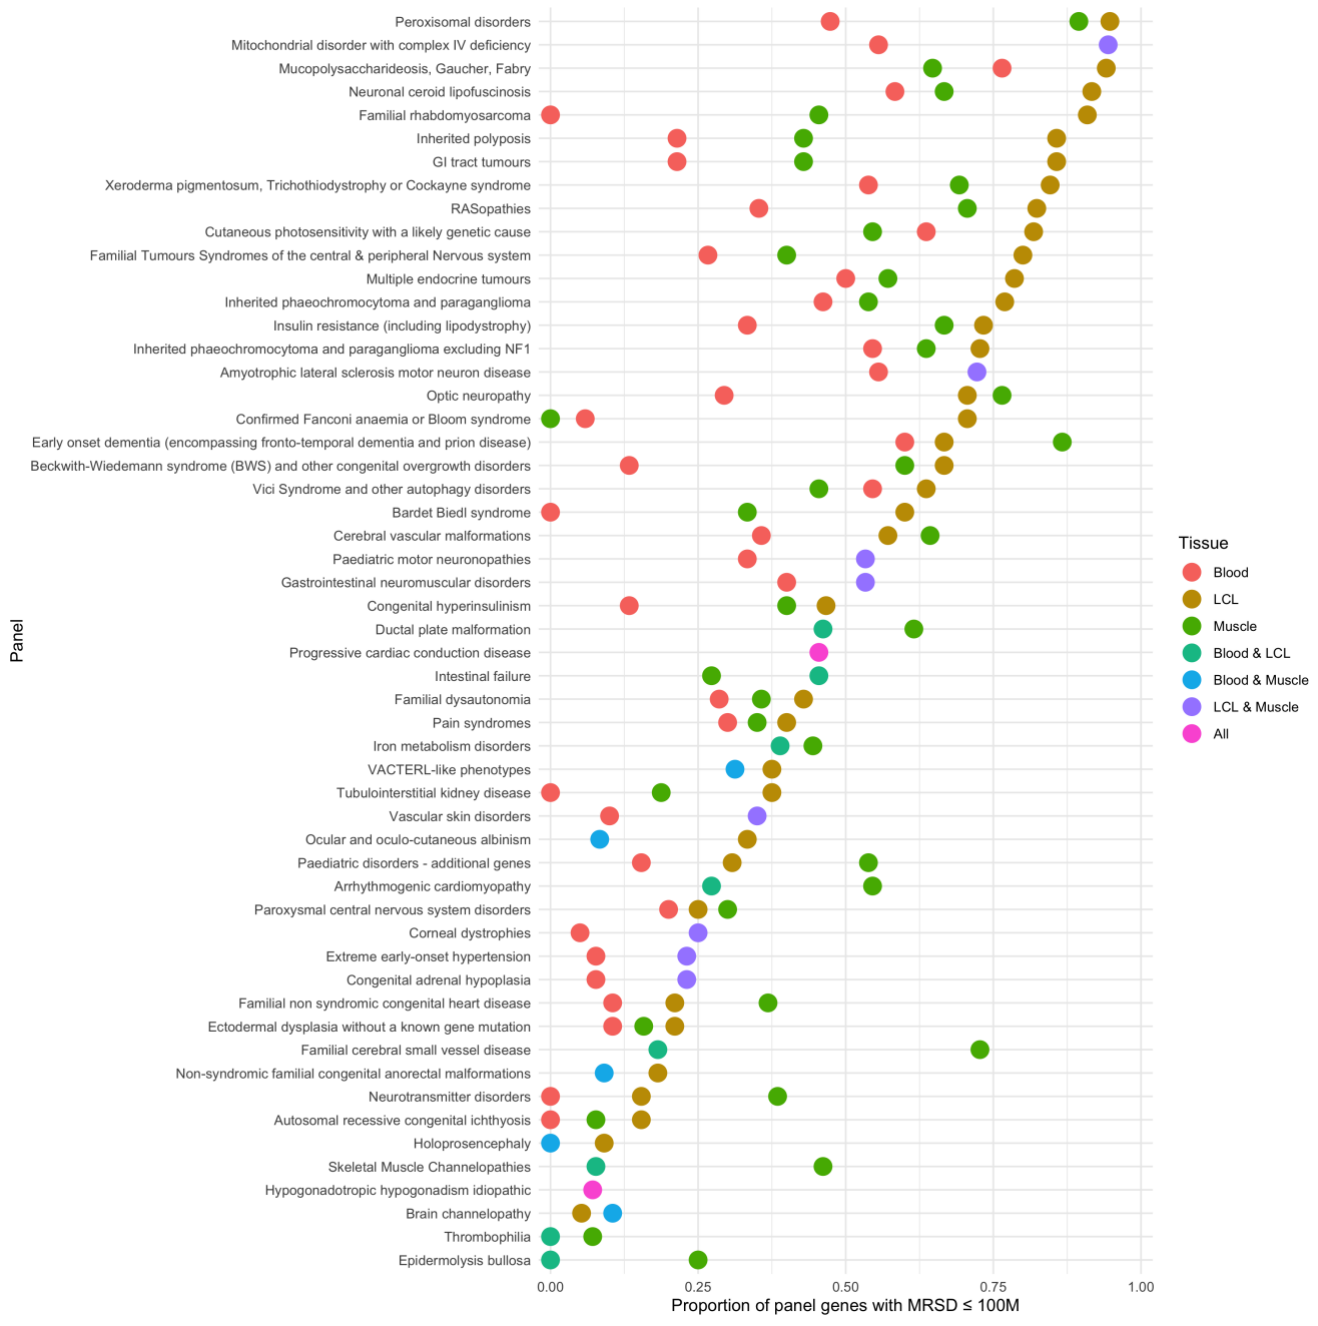

### d) Low-MRSD gene proportions for very small panels ( $\leq 10$ genes)

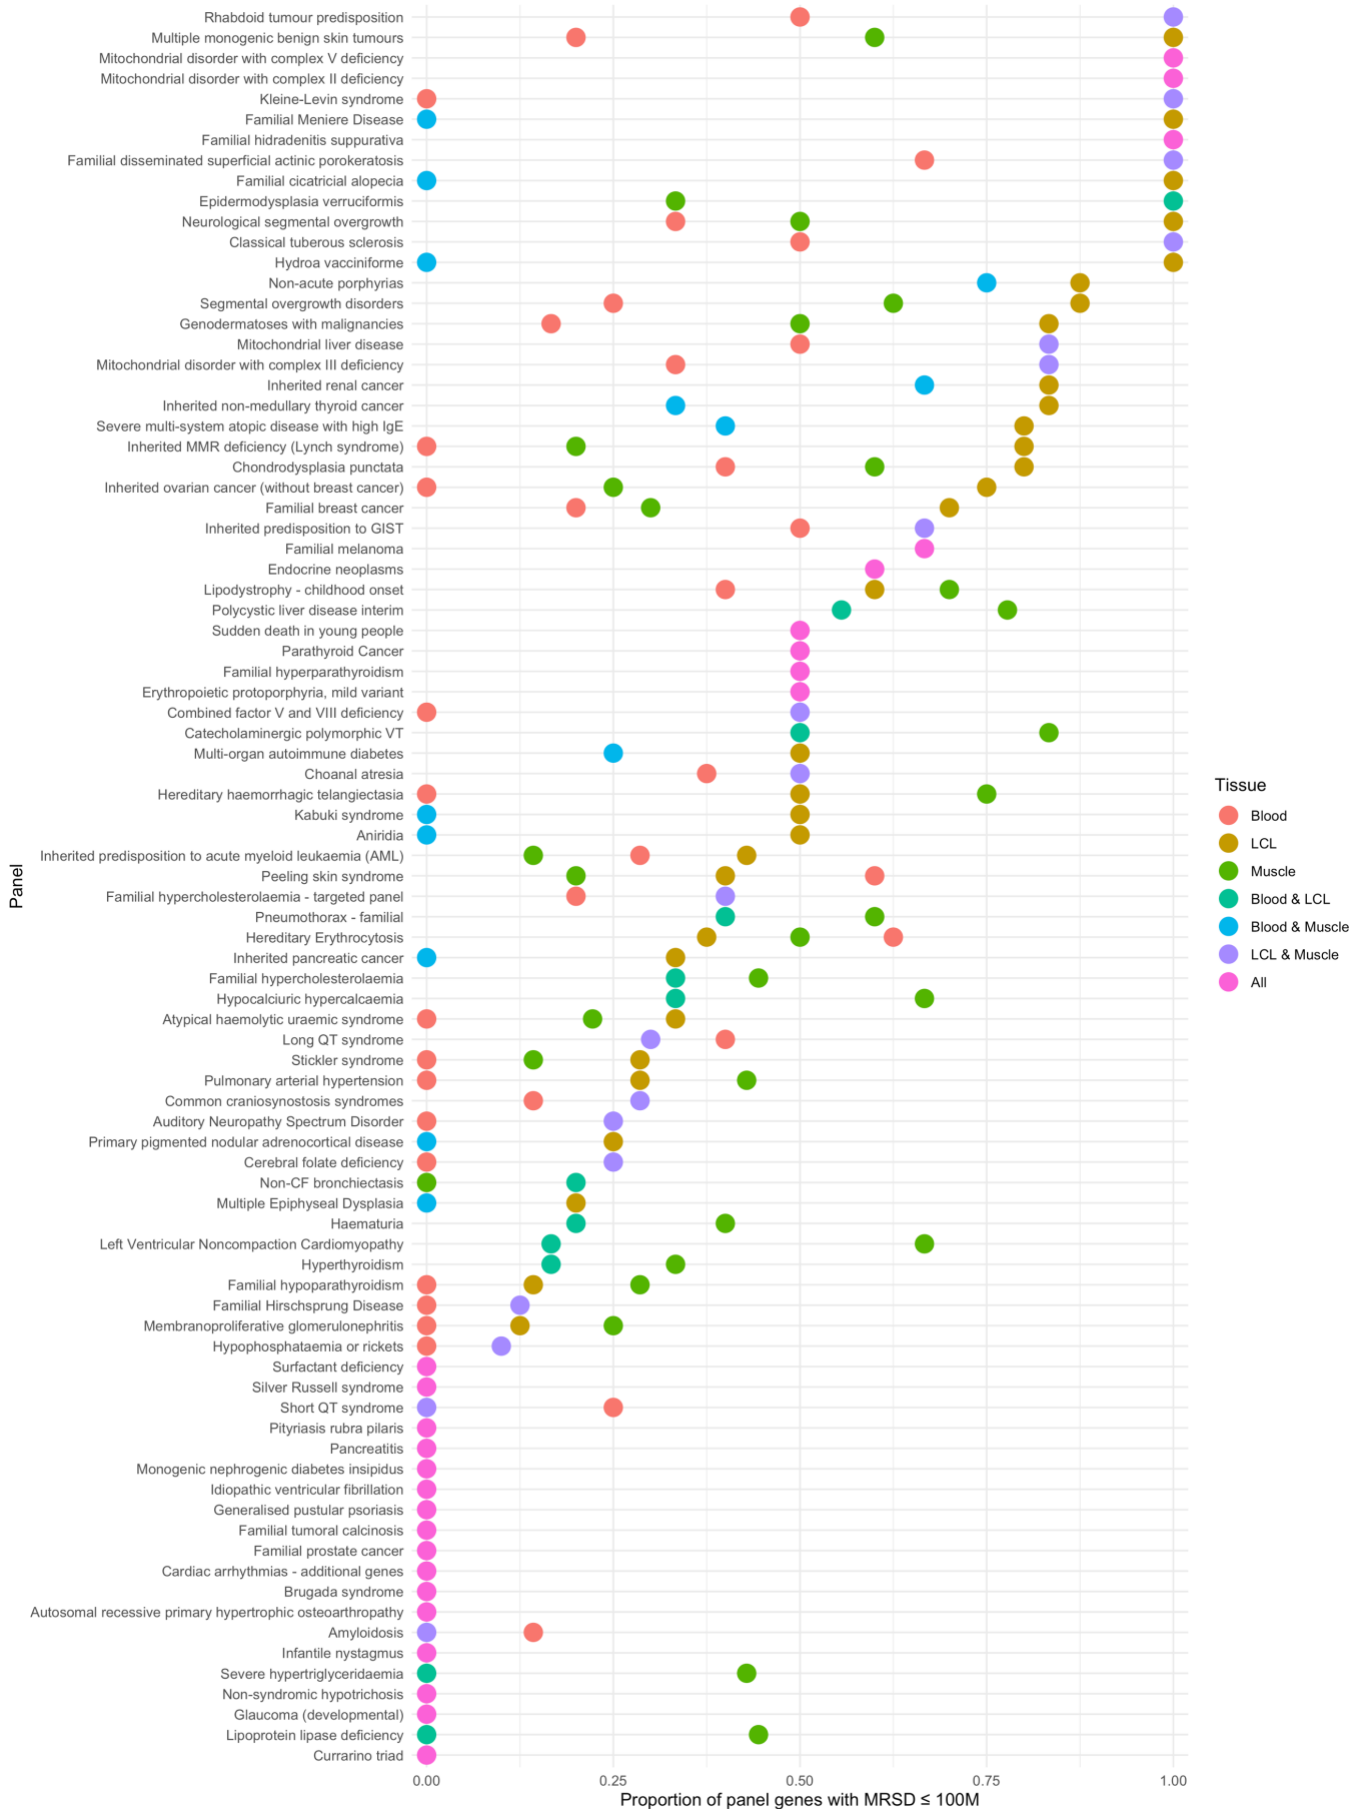



**Supplementary Figure 9.** Proportion of low-MRSD genes per tissue for all PanelApp panels, ordered alphabetically by panel name.

**a) Low-MRSD gene proportions for panels named A-E**

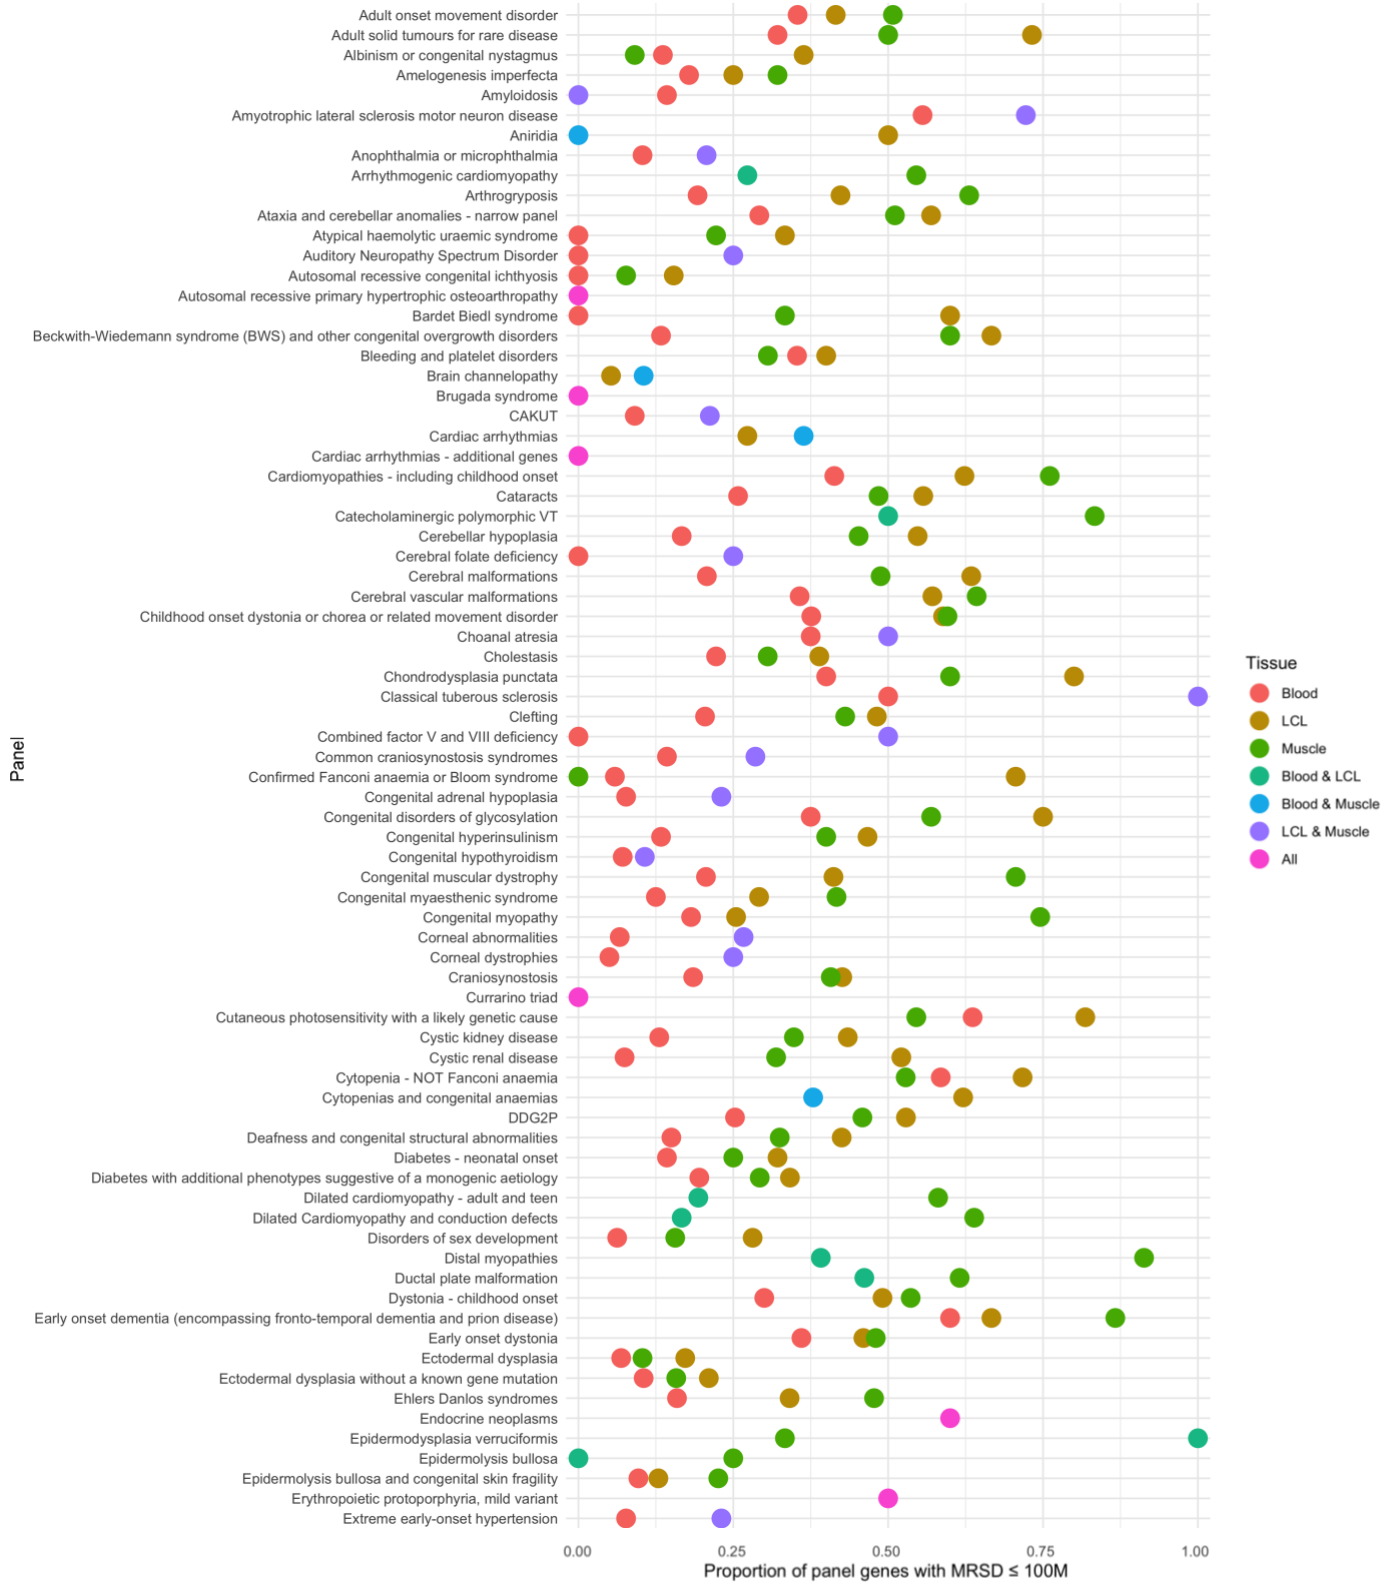



## b) Low-MRSD proportions for panels named F-L

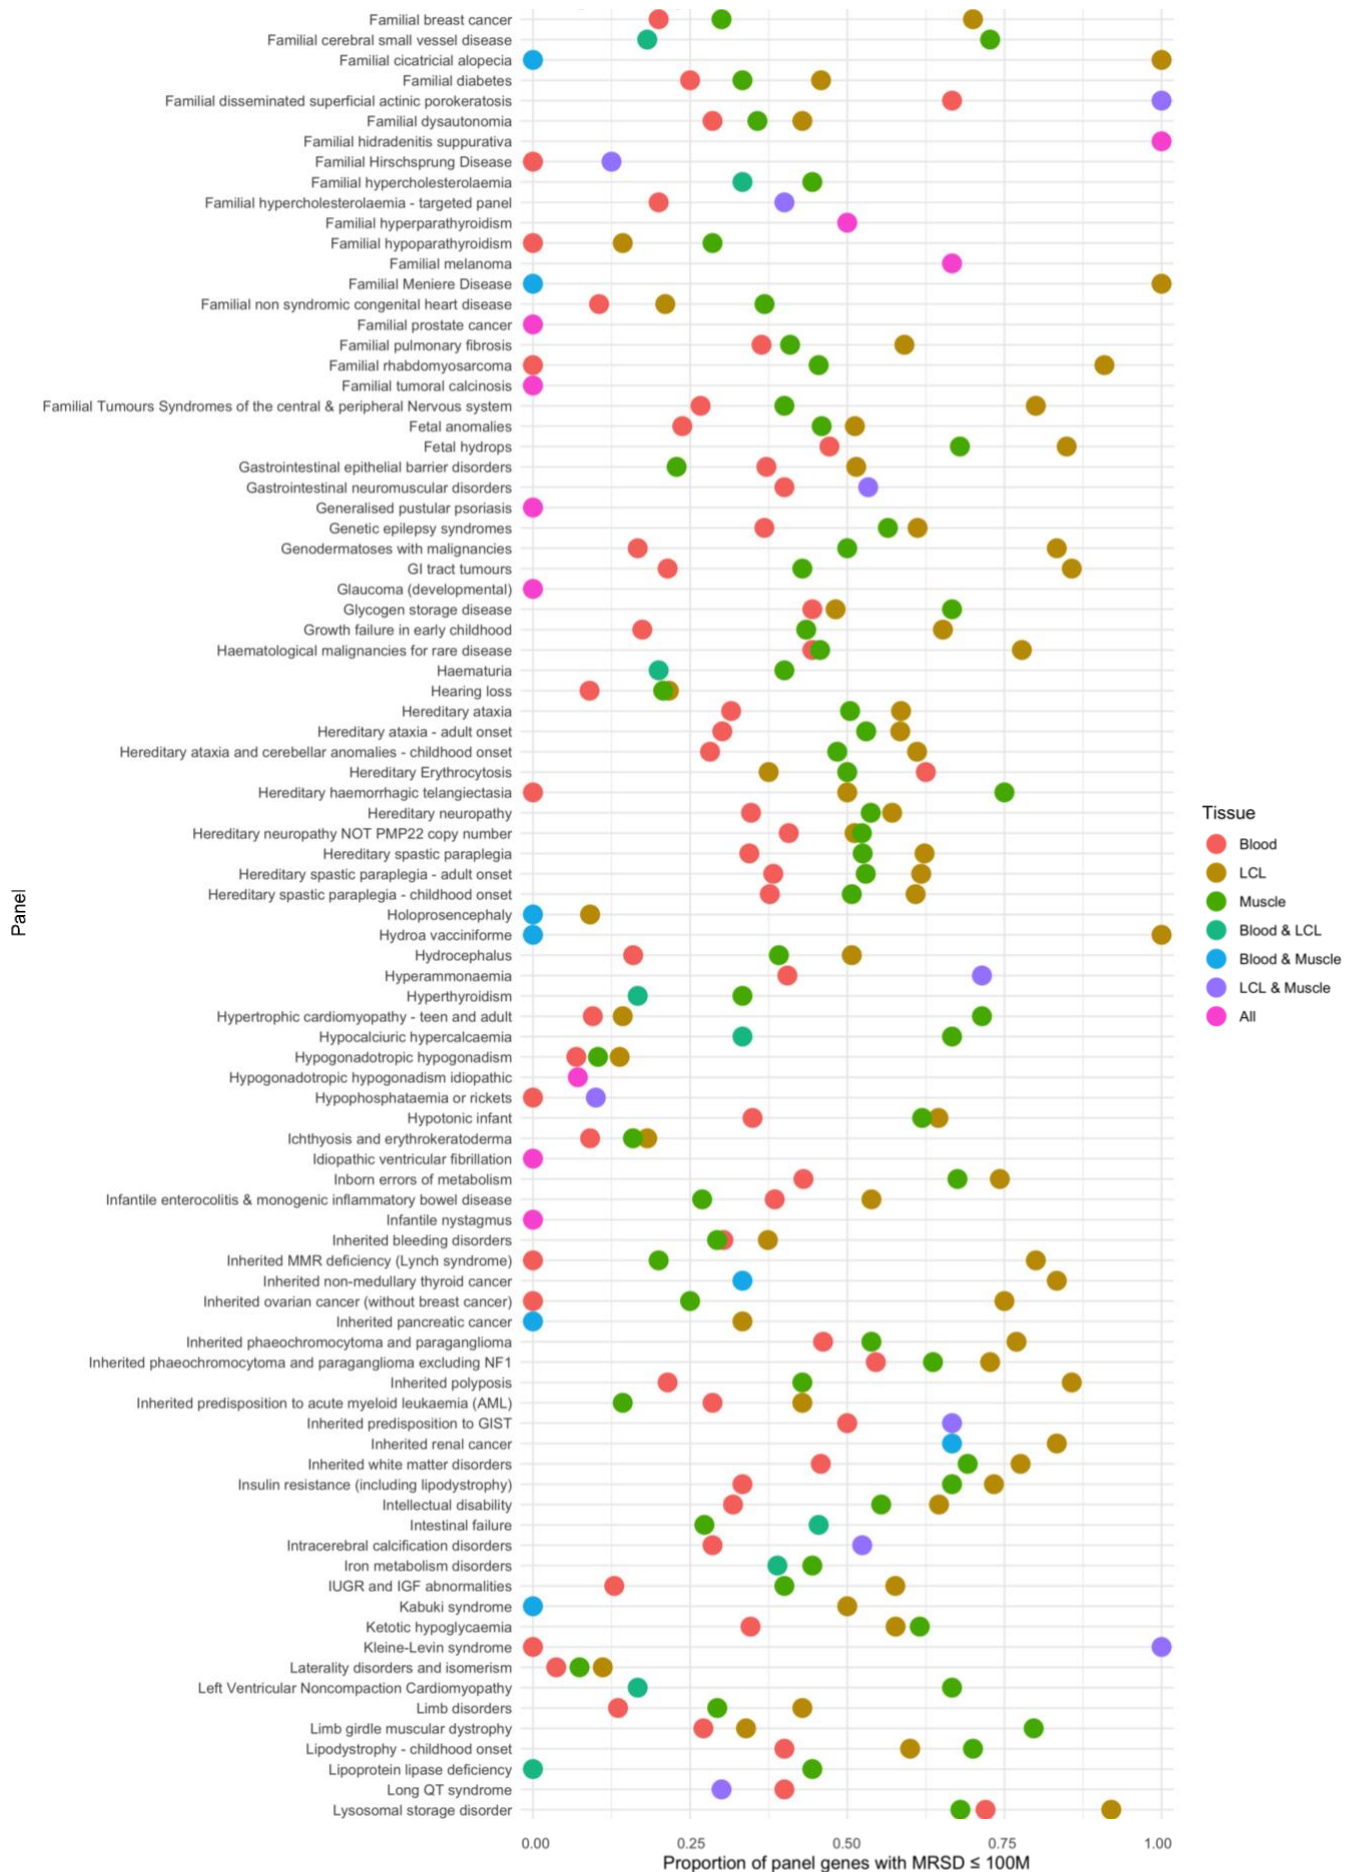

### c) Low-MRSD gene proportions for panels named M-X

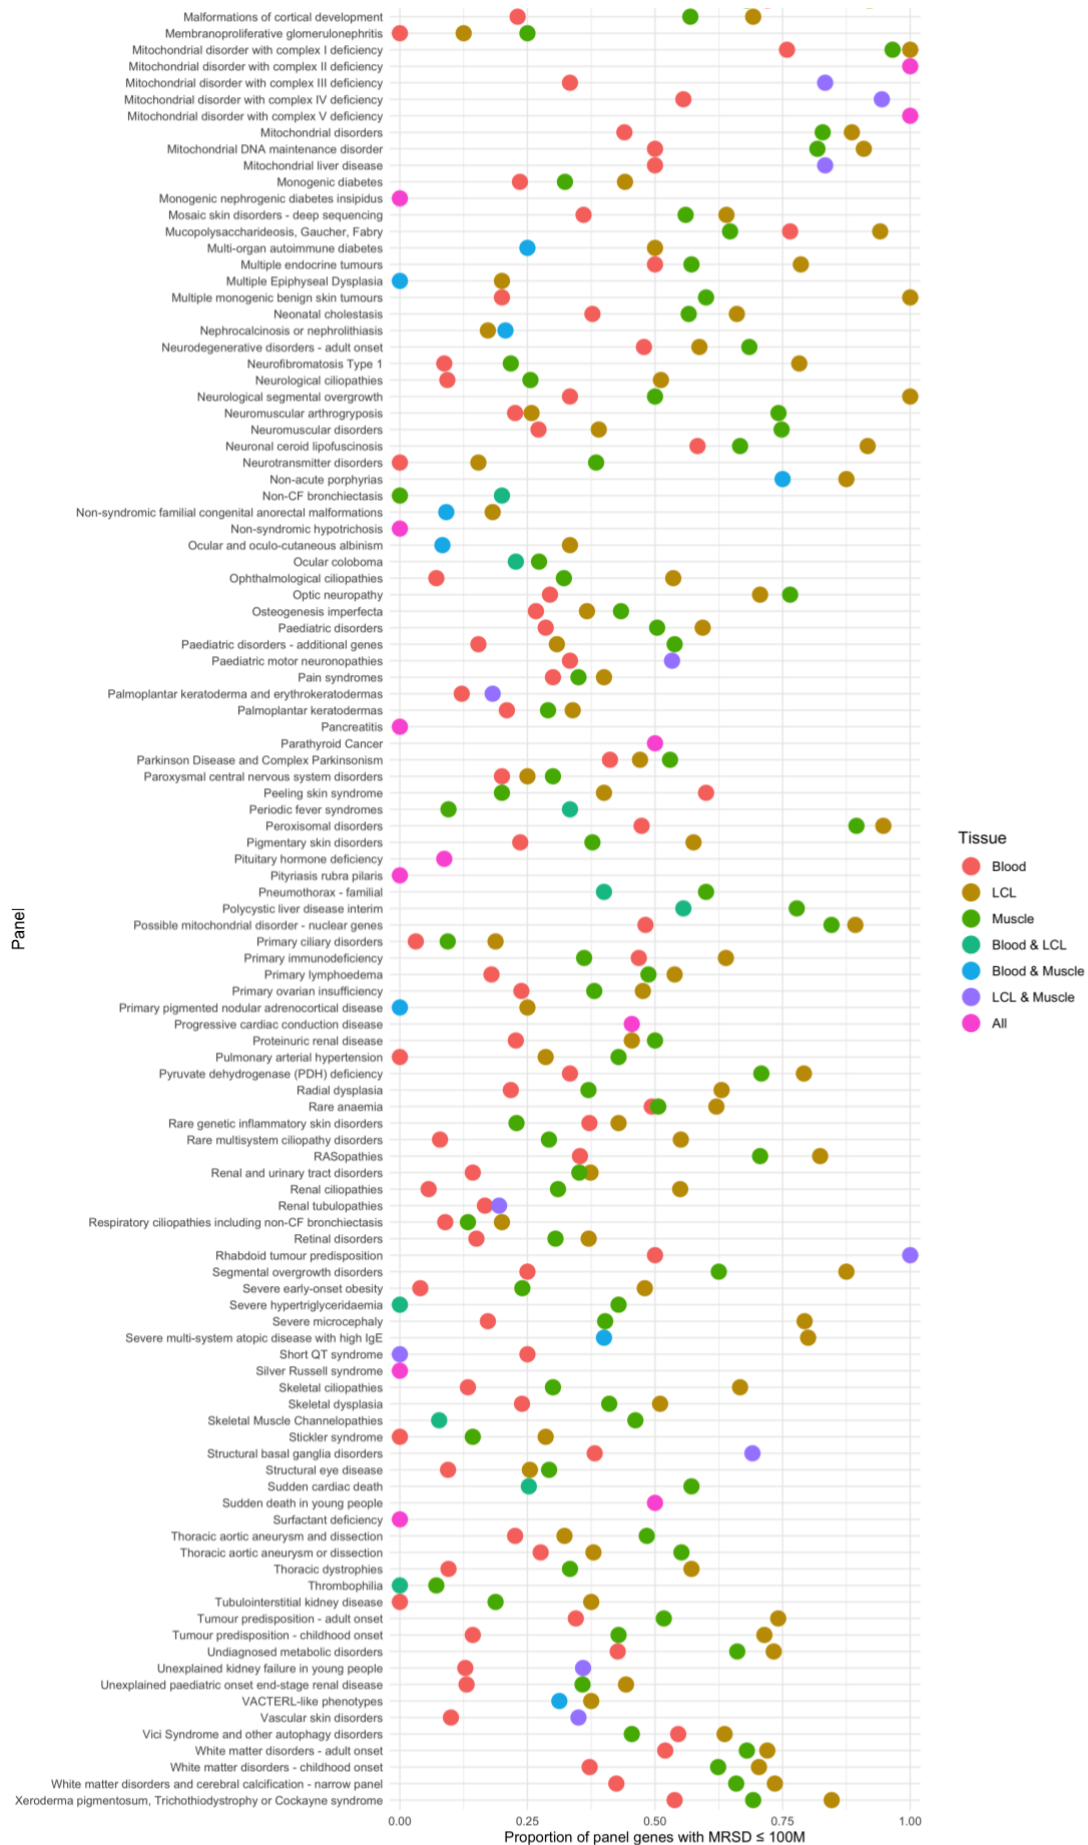

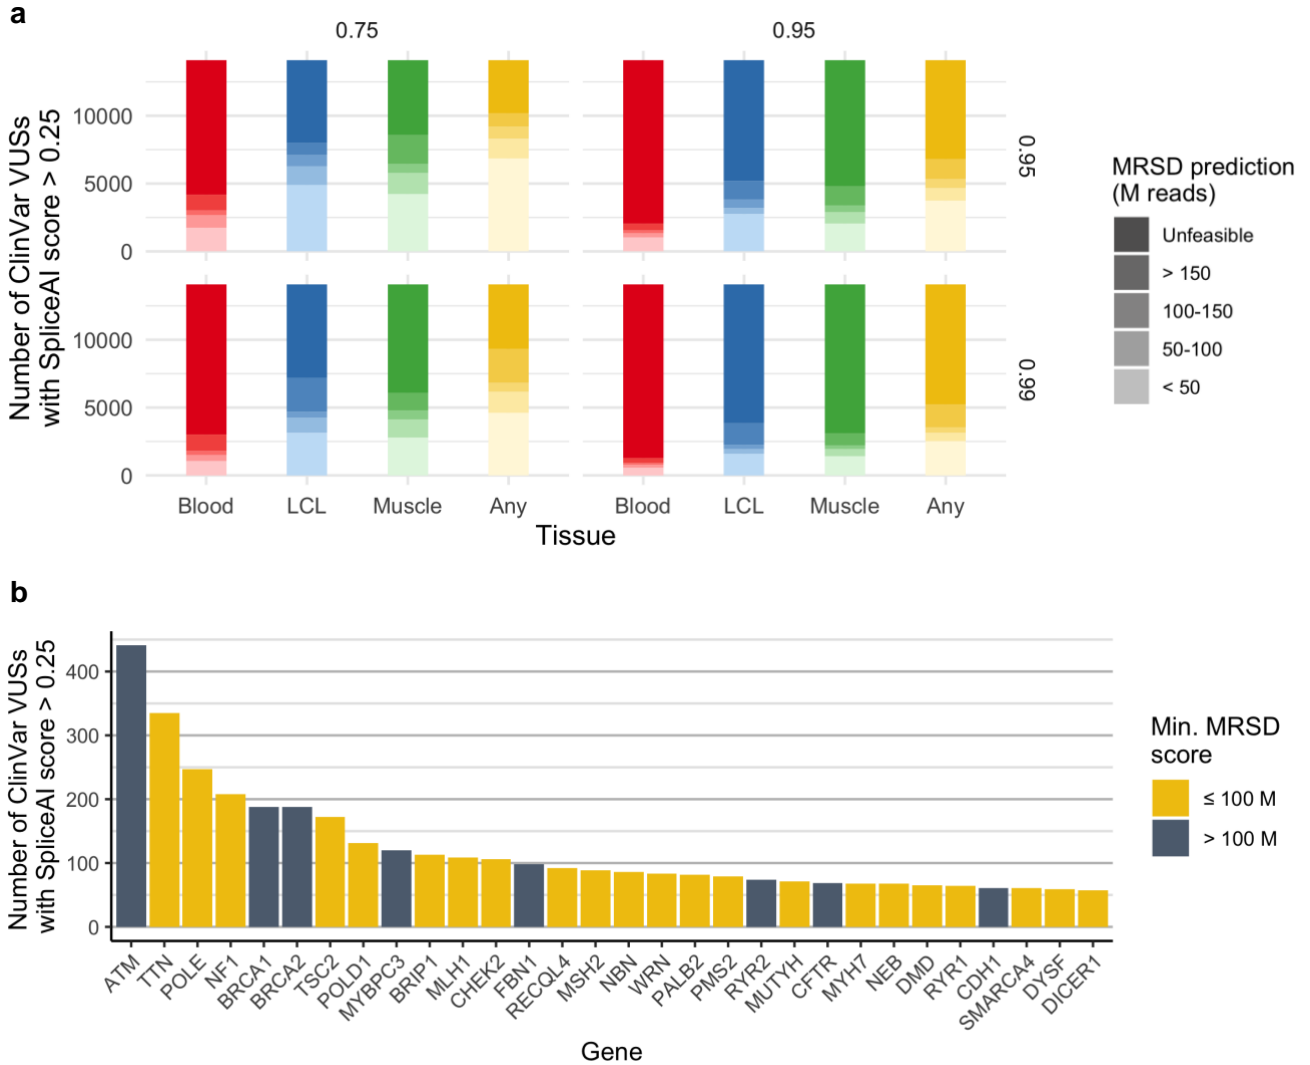

**Supplementary Figure 10.** The potential power of RNA-seq for resolving ClinVar variants of uncertain significance (VUSs). Similarly to Figure 7 (main text), we analyzed the distribution of MRSD predictions for genes harbouring ClinVar VUSs with SpliceAI predictions > 0.25 [2]. Of the 185,119 ClinVar variants annotated as “Uncertain significance” or “Conflicting interpretations of pathogenicity”, 13,602 (7.3%) passed this threshold, and so were deemed “predicted splice-impacting”. **(a)** Across all parameter combinations, a greater number of variants were in genes that were predicted low-MRSD (MRSD ≤ 100 M reads) in LCLs than in any other tissue. Dependent on parameter stringency, between 22.3% and 59.2% of variants were in genes predicted low-MRSD in at least one of the three tissues. **(b)** Among the 30 genes containing the largest number of predicted splice-impacting VUSs in ClinVar, 22 were predicted low-MRSD in at least one of the three tissues.

**Supplementary Methods 1. Illustration of MRSD calculation methodology.** MRSD scores utilize the level of read coverage supporting the existence of splice junctions in control RNA-seq datasets to predict the depth of sequencing required to achieve a specified level of splice junction coverage. In a given individual and gene:

1. Read coverage values are collated across all splice junctions in the transcript model for that gene (see Supplementary Methods 2, below)
2. Each of these values is divided by the sequencing depth – by default defined as the number of uniquely mapping sequencing reads – and multiplied by  $10^6$  to produce a per-1 M read coverage value for each junction
3. The desired level of read coverage is divided by the per-1 M read coverage value of the splice junction with the  $X$ 'th percentile lowest read coverage, which gives the depth of sequencing that would be required for  $X\%$  of junctions to be covered with the desired number of reads or higher. This figure is the sample-specific MRSD.

This process is iterated across all control RNA-seq samples to generate a list of sample-specific MRSDs, and a global MRSD is then derived by taking the  $Z$ 'th percentile highest prediction from among these ( $Z$  corresponding to the so-called *confidence level*, i.e. the proportion of control RNA-seq samples for which that level of sequencing would have sufficiently covered that gene).

**1. Collation of splice junction read supports**

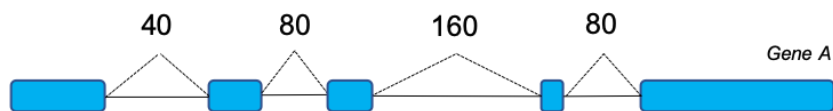

Coverage of splice junctions in individual X (sequenced to depth of 40 M reads)

**2. Calculation of per-1 M read coverage**

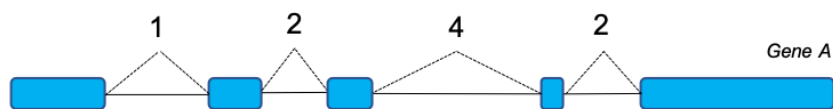

Coverage of splice junctions per 1 M reads in individual X

**3. Inference of MRSD for specified coverage parameters**

e.g. for 75% of splice junctions to be covered by 8 reads or more:

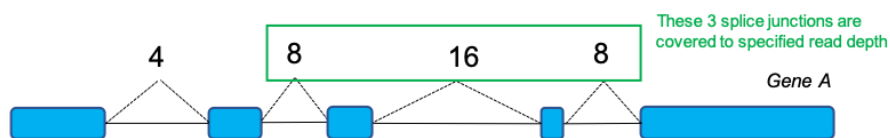

Coverage of splice junctions per 4 M reads in individual X

→ MRSD = 4 M reads

**Supplementary Methods 2. Tiering methodology for selection of transcripts for MRSD generation.** To calculate MRSD values for all protein-coding genes, a single transcript model was established for each gene. Firstly, transcripts present in the MANE v0.7 curated transcript set were selected for genes where these existed, provided the co-ordinates of all splice junctions in that transcript (given in relation to the GRCh38 reference genome) mapped back to known junctions in build GRCh37. For genes where these conditions were not met, transcript models were formed from the union of all junctions present in all RefSeq transcripts listed for that gene on Ensembl BioMart. Finally, for any genes lacking a corresponding RefSeq transcript, a transcript model was derived consisting of the union of all junctions present in all transcripts assigned to that gene in the GENCODE v19 annotation.

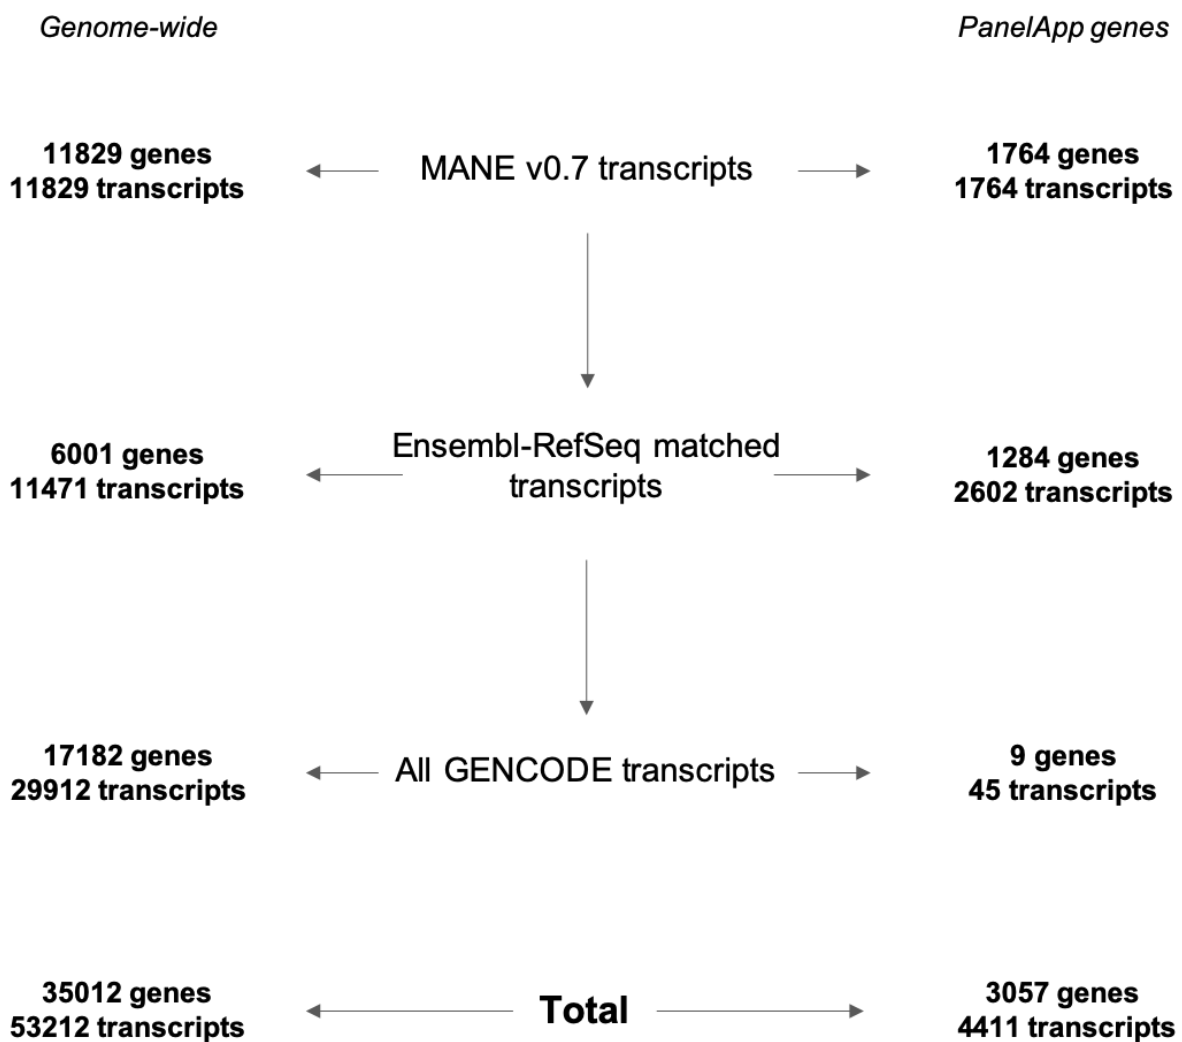

**Supplementary Methods 3.** *Tissue-specific criteria for filtering of high-quality GTEx control RNA-seq datasets.* Filtering of GTEx controls was conducted to select the highest quality samples based on the below tissue-specific parameters. Parameters were selected and adjusted on a tissue-by-tissue basis to exclude metric outliers and samples that may confound analysis of pathogenic splicing events (e.g. excluding cancer patients from LCL control cohorts, in which inherited breast cancer was studied). The corresponding column names in the GTEx v8 sample attribute (pht002743.v8) and subject phenotype (pht002742.v8) files are italicized.

*Skeletal muscle (as listed in [1])*

- RNA integrity number/RIN (*SMRIN*): between 6-9
- Sample ischemic time (*SMTSISCH*): <720 (i.e. <12 hours)
- Hardy scale (*DTHHRDY*): 0, 1 or 2, corresponding to sudden deaths
- Age (*AGE*): <50
  - Unless BMI <30

*Whole blood*

- Samples included in GTEx analysis freeze, corresponding to higher quality samples (*SMAFRZE*): not flagged EXCLUDE due to technical issues
- RIN (*SMRIN*): between 6-9
- Sample ischemic time (*SMTSISCH*): <0
- Hardy scale (*DTHHRDY*): 0, 1 or 2

*EBV-transformed lymphocytes (LCLs)*

- *SMAFRZE*: not flagged EXCLUDE due to technical issues
- RIN (*SMRIN*): > 9
- *MHCANCER5*, *MHCANCERC* and *MHCANCERNM* all 0 to eliminate all non-metastatic cancers and all cancers in the past 5 years or current
- *DTHHRDY*: 0, 1 or 2
- No reported history (*MHGNCMT*) of:
  - Breast cancer
  - Ovarian cancer
  - Pancreatic cancer
  - Prostate cancer
  - Colorectal cancer
  - No patients filtered out through this criterion

*Cultured fibroblasts*

- As for EBV-transformed lymphocytes, except with the addition of the following:
  - RIN (*SMRIN*) > 9.7
  - Uniquely mapping reads (*MPPDUN*): > 60 M

**Supplementary Methods 4.** *Sample IDs of GTEX samples used to generate control datasets.*

**Skeletal muscle** (as listed in [1])

GTEX-111CU-2026  
GTEX-111YS-2326  
GTEX-1122O-2426  
GTEX-113JC-2726  
GTEX-117YX-2526  
GTEX-11DXX-2726  
GTEX-11DXZ-2426  
GTEX-11EM3-2126  
GTEX-11EMC-2626  
GTEX-11EQ9-2126  
GTEX-11I78-2426  
GTEX-11LCK-1226  
GTEX-11NSD-2026  
GTEX-11P81-2526  
GTEX-11P82-1826  
GTEX-11VI4-1926  
GTEX-11WQC-2626  
GTEX-11WQK-0726  
GTEX-11XUK-2226  
GTEX-11ZTT-2626  
GTEX-11ZVC-2726  
GTEX-1211K-2126  
GTEX-12BJ1-2526  
GTEX-12C56-1926  
GTEX-12WSJ-1726  
GTEX-12WSN-2526  
GTEX-12ZZX-0326  
GTEX-12ZZY-0626  
GTEX-13111-2226  
GTEX-1314G-1726  
GTEX-131XF-2326  
GTEX-131XG-2326  
GTEX-132AR-1026  
GTEX-132NY-0726  
GTEX-1339X-2426  
GTEX-133LE-2026  
GTEX-1399Q-2426  
GTEX-1399R-2526  
GTEX-1399S-2726  
GTEX-1399U-2526  
GTEX-139D8-0726  
GTEX-139UW-2626  
GTEX-139YR-2526  
GTEX-13CF3-1826  
GTEX-13D11-2526  
GTEX-13FH7-2126  
GTEX-13FHO-0726  
GTEX-13FTW-2326  
GTEX-13FTY-0226  
GTEX-OIZH-1626  
GTEX-OOBJ-1626  
GTEX-P4PP-1626  
GTEX-P4PQ-1626  
GTEX-P78B-1626  
GTEX-POMQ-1926-SM-3NB1Y  
GTEX-POYW-0526-SM-2XCEY  
GTEX-PSDG-0426  
GTEX-PWCY-2026  
GTEX-Q2AH-1826-SM-2S1Q2  
GTEX-Q734-2026-SM-3GADA  
GTEX-QCQG-2126-SM-2S1P8  
GTEX-QDVN-2426-SM-2S1Q4  
GTEX-QV44-2026-SM-2S1RD  
GTEX-R53T-1826-SM-3GIJX  
GTEX-R55D-0626-SM-3GAD5  
GTEX-S32W-2326-SM-2XCAW  
GTEX-S33H-2226  
GTEX-S7SF-2026-SM-3K2AS  
GTEX-SNMC-1426-SM-2XCFM  
GTEX-SUCS-1626-SM-32PLS  
GTEX-T5JC-0626-SM-3NMA6  
GTEX-T5JW-1826-SM-3GAE1  
GTEX-TKQ2-0826-SM-33HB6  
GTEX-TML8-1826-SM-32QOR  
GTEX-TMMY-0426-SM-33HBB  
GTEX-U3ZG-0326-SM-47JXN  
GTEX-U3ZH-1926-SM-4DXTR  
GTEX-U3ZM-1226-SM-3DB9G  
GTEX-U4B1-1626-SM-3DB8N  
GTEX-UJHI-1726-SM-3DB9B  
GTEX-UJMC-1826-SM-3GADT  
GTEX-VUSG-2626-SM-4KKZI  
GTEX-WHPG-2226-SM-3NMBO  
GTEX-WHSB-1826-SM-3TW8M  
GTEX-WOFM-1326-SM-3MJFR  
GTEX-WRHK-1626-SM-3MJFH  
GTEX-WRHU-0826-SM-3MJFN  
GTEX-WXYG-2526-SM-3NB3F  
GTEX-WY7C-2526-SM-3NB2N  
GTEX-WZTO-0826-SM-3NM8Q  
GTEX-X4XY-0626-SM-4E3IN  
GTEX-X638-0326-SM-47JY1  
GTEX-X88G-0326-SM-47JZ4  
GTEX-XBEC-0626  
GTEX-XBED-2626-SM-4E3J5  
GTEX-XBEW-1026  
GTEX-XOTO-0526-SM-4B662  
GTEX-XPT6-2026-SM-4B64V

GTEX-13FXS-0326  
GTEX-13JUV-2326  
GTEX-13N11-2726  
GTEX-13N2G-2326  
GTEX-13N29-0626  
GTEX-13N2B-2626  
GTEX-13O61-2326  
GTEX-13OVG-2126  
GTEX-13OVH-0626  
GTEX-13OVI-1726  
GTEX-13OW6-0626  
GTEX-13PL7-0626  
GTEX-13PVR-2526  
GTEX-13QBU-2426  
GTEX-13QJ3-0726  
GTEX-13S7M-0326  
GTEX-13S86-2326  
GTEX-13U4I-1826  
GTEX-13VXT-0326  
GTEX-13W3W-2626  
GTEX-13W46-0726  
GTEX-13YAN-0526  
GTEX-144GL-0326  
GTEX-144GM-2026  
GTEX-144GN-2426  
GTEX-145LT-1626  
GTEX-145LV-2326  
GTEX-145ME-2026  
GTEX-145MI-0326  
GTEX-145MN-2426  
GTEX-146FH-0526  
GTEX-146FQ-0326  
GTEX-147F3-0226  
GTEX-1497J-2626  
GTEX-14A6H-2826  
GTEX-14AS3-2126  
GTEX-14BMV-0326  
GTEX-14C39-2426  
GTEX-14ICL-1926  
GTEX-O5YT-1626-SM-32PK6  
GTEX-OHPK-1626-SM-2YUN3  
GTEX-OHPL-1626  
GTEX-OHPM-1626

GTEX-XQ8I-0626-SM-4BOPT  
GTEX-XUJ4-2626-SM-4BOQ3  
GTEX-XUW1-0826-SM-4BOP6  
GTEX-XUYS-0326-SM-47JX2  
GTEX-XUZC-2126-SM-4BRW8  
GTEX-XV7Q-2926-SM-4BRUL  
GTEX-XYKS-2426-SM-4AT43  
GTEX-Y114-2526  
GTEX-Y3IK-2626  
GTEX-Y5LM-2126  
GTEX-Y5V5-2526  
GTEX-Y5V6-2626  
GTEX-Y8E4-1026  
GTEX-Y8E5-0326  
GTEX-Y8LW-2026  
GTEX-Y9LG-1926  
GTEX-YB5E-2226  
GTEX-YB5K-2326  
GTEX-YBZK-0326  
GTEX-YEC3-2126  
GTEX-YEC4-2226  
GTEX-YF7O-2526  
GTEX-YFC4-1026  
GTEX-Z9EW-1726  
GTEX-ZA64-2026  
GTEX-ZAKK-0326  
GTEX-ZC5H-0326  
GTEX-ZDYS-1726  
GTEX-ZPCL-2026  
GTEX-ZPIC-2526  
GTEX-ZQG8-1226  
GTEX-ZQUD-1726  
GTEX-ZT9X-1826  
GTEX-ZTPG-0126  
GTEX-ZTX8-1626  
GTEX-ZV6S-2126  
GTEX-ZV7C-2426  
GTEX-ZVZO-0326  
GTEX-ZVZP-2526  
GTEX-ZY6K-2026  
GTEX-ZYFG-2426  
GTEX-ZYWO-2626  
GTEX-ZZ64-1526



## Whole blood

GTEX-113JC-0006-SM-5O997  
GTEX-1192W-0005-SM-5NQBQ  
GTEX-11DXX-0005-SM-5NQB8  
GTEX-11EMC-0006-SM-5O9DN  
GTEX-11GSP-0006-SM-5N9EL  
GTEX-11178-0005-SM-5N9GB  
GTEX-11LCK-0005-SM-5O98U  
GTEX-11OF3-0006-SM-5O9CM  
GTEX-11ONC-0005-SM-5O9CY  
GTEX-11P7K-0006-SM-5N9FM  
GTEX-11P82-0006-SM-5N9FY  
GTEX-11TT1-0005-SM-5NQB8Y  
GTEX-11VI4-0006-SM-5N9D8  
GTEX-11WQK-0005-SM-5O9AV  
GTEX-11ZTT-0006-SM-5N9FX  
GTEX-1212Z-0006-SM-5NQB8M  
GTEX-1269C-0005-SM-5N9CJ  
GTEX-12C56-0006-SM-5N9E9  
GTEX-12KS4-0005-SM-5SI94  
GTEX-12WSI-0005-SM-5O99K  
GTEX-12WSK-0006-SM-5NQA1  
GTEX-12WSM-0005-SM-5NQB3  
GTEX-12WSN-0006-SM-5NQAP  
GTEX-12ZZX-0005-SM-5O9A9  
GTEX-13113-0006-SM-5NQB7X  
GTEX-1314G-0005-SM-5NQB9O  
GTEX-131XE-0006-SM-5P9F9  
GTEX-131XG-0006-SM-5O9CE  
GTEX-132NY-0005-SM-5O9AC  
GTEX-1399R-0006-SM-5N9FR  
GTEX-139UW-0005-SM-5NQB8U  
GTEX-13CF3-0006-SM-5N9ED  
GTEX-13FTX-0005-SM-5N9F6  
GTEX-13FXS-0006-SM-5O99X  
GTEX-13OVG-0005-SM-5P9HA  
GTEX-13OVH-0005-SM-5P9HB  
GTEX-13OVI-0001-SM-5O9BL  
GTEX-13OVK-0006-SM-5O9B7  
GTEX-13OVL-0006-SM-5O996  
GTEX-13OW6-0005-SM-5NQB9Z  
GTEX-13OW8-0005-SM-5NQBAC  
GTEX-13PL7-0005-SM-5N9ET  
GTEX-13S7M-0005-SM-5NQB76  
GTEX-13VXT-0005-SM-5N9F3  
GTEX-147F3-0005-SM-5N9FI  
GTEX-147JS-0006-SM-5NQB7K  
GTEX-148VI-0006-SM-5O9A6  
GTEX-14A5H-0006-SM-5O9AI  
GTEX-14AS3-0006-SM-5NQB2C  
GTEX-14B4R-0006-SM-5O9A7  
GTEX-14BMV-0005-SM-5NQB6Y  
GTEX-14C38-0006-SM-5NQB8F  
GTEX-14C39-0005-SM-5NQB8R

GTEX-QEG5-0006-SM-2I5FZ  
GTEX-QESD-0006-SM-2I5G6  
GTEX-R55C-0005-SM-3GAE9  
GTEX-RWS6-0005-SM-2XCAN  
GTEX-S341-0006-SM-3NM8D  
GTEX-SSA3-0005-SM-32QOT  
GTEX-T5JW-0005-SM-3GADE  
GTEX-T6MN-0005-SM-32PLJ  
GTEX-T6MO-0006-SM-32QOU  
GTEX-T8EM-0006-SM-3DB71  
GTEX-TKQ1-0006-SM-33HBI  
GTEX-TKQ2-0006-SM-33HBH  
GTEX-TML8-0005-SM-32QPA  
GTEX-TMZS-0006-SM-3DB8G  
GTEX-U3ZG-0006-SM-47JWX  
GTEX-U3ZH-0005-SM-3DB72  
GTEX-U4B1-0006-SM-3DB8E  
GTEX-UJMC-0005-SM-3GACU  
GTEX-UPJH-0006-SM-3GACW  
GTEX-V1D1-0006-SM-3NMCE  
GTEX-V955-0005-SM-3P5ZC  
GTEX-VJYA-0005-SM-3P5ZD  
GTEX-VUSG-0006-SM-3GIK9  
GTEX-WCDI-0005-SM-3NB2M  
GTEX-WFG7-0005-SM-3GIKM  
GTEX-WFON-0005-SM-3NMC9  
GTEX-WH7G-0005-SM-3NMBX  
GTEX-WHPG-0006-SM-3NMBV  
GTEX-WHSB-0005-SM-3LK7C  
GTEX-WHWD-0005-SM-3LK7D  
GTEX-WOFL-0006-SM-3TW8K  
GTEX-WOFM-0005-SM-3MJF3  
GTEX-WQUQ-0006-SM-3MJF4  
GTEX-WRHK-0005-SM-3MJF5  
GTEX-WRHU-0006-SM-3MJF6  
GTEX-WVLH-0006-SM-3MJF7  
GTEX-WXYG-0005-SM-3NB3M  
GTEX-WY7C-0006-SM-3NB3L  
GTEX-WYVS-0006-SM-3NMA7  
GTEX-WZTO-0006-SM-3NM9T  
GTEX-X15G-0005-SM-3NMDA  
GTEX-X3Y1-0006-SM-3P5ZG  
GTEX-X5EB-0006-SM-46MV5  
GTEX-X638-0005-SM-47JX6  
GTEX-X88G-0006-SM-47JX5  
GTEX-XBED-0006-SM-47JXO  
GTEX-XBEW-0006-SM-4AT4E  
GTEX-XMK1-0005-SM-4B665  
GTEX-XPT6-0006-SM-4B66Q  
GTEX-XXEK-0005-SM-4BRWJ  
GTEX-XYKS-0005-SM-4BRUD  
GTEX-Y114-0006-SM-4TT76  
GTEX-Y5LM-0005-SM-4V6EJ

GTEX-14DAR-0006-SM-5N9GC  
GTEX-14E1K-0006-SM-5N9DY  
GTEX-14H4A-0006-SM-5N9E3  
GTEX-14ICK-0006-SM-5NQB5  
GTEX-14ICL-0006-SM-5SIAB  
GTEX-N7MT-0007-SM-3GACQ  
GTEX-O5YT-0007-SM-32PK7  
GTEX-O5YW-0006-SM-3LK6E  
GTEX-OHPL-0006-SM-3MJHB  
GTEX-OIZF-0006-SM-2I5GQ  
GTEX-OIZI-0005-SM-2XCED  
GTEX-OXRP-0006-SM-2I3FN  
GTEX-P4QS-0005-SM-2I3EY  
GTEX-P78B-0005-SM-2I5GM  
GTEX-PLZ5-0006-SM-5S2W5  
GTEX-PLZ6-0006-SM-33HBZ  
GTEX-POMQ-0006-SM-5SI7D  
GTEX-PSDG-0005-SM-3GADC  
GTEX-PVOW-0006-SM-3NMB8  
GTEX-PW2O-0006-SM-2I3DV  
GTEX-PWCY-0005-SM-33HBP  
GTEX-Q2AG-0005-SM-5SI7F  
GTEX-Q2AH-0005-SM-33HBR  
GTEX-Q2AI-0006-SM-2I3FG  
GTEX-QCQG-0006-SM-5SI8M

GTEX-Y5V5-0006-SM-4V6FE  
GTEX-Y5V6-0005-SM-4V6FD  
GTEX-Y8E4-0006-SM-4V6EW  
GTEX-Y8E5-0006-SM-47JWQ  
GTEX-Y8LW-0005-SM-4V6EV  
GTEX-Y9LG-0006-SM-4VBRK  
GTEX-YB5K-0005-SM-4VDSP  
GTEX-YBZK-0005-SM-59HKG  
GTEX-YFC4-0006-SM-4RGLV  
GTEX-ZC5H-0005-SM-4WAXM  
GTEX-ZDYS-0002-SM-4WKGR  
GTEX-ZE9C-0006-SM-4WKG2  
GTEX-ZF29-0006-SM-4WKGQ  
GTEX-ZGAY-0006-SM-4WWAQ  
GTEX-ZP4G-0006-SM-4WWE6  
GTEX-ZPIC-0005-SM-4WWEB  
GTEX-ZPU1-0006-SM-4WWAT  
GTEX-ZQG8-0005-SM-4YCEH  
GTEX-ZQUD-0005-SM-4YCE5  
GTEX-ZVE2-0006-SM-51MRW  
GTEX-ZVP2-0005-SM-51MRK  
GTEX-ZVT2-0005-SM-57WBW  
GTEX-ZVZP-0006-SM-51MSW  
GTEX-ZXES-0005-SM-57WCB

## EBV-transformed lymphocytes (LCLs)

GTEX-1122O-0003-SM-5Q5DL  
GTEX-11EM3-0001-SM-5Q5BD  
GTEX-11EMC-0002-SM-5Q5DO  
GTEX-11OC5-0004-SM-5S2O6  
GTEX-11P7K-0003-SM-5S2OU  
GTEX-11TT1-0004-SM-5S2NT  
GTEX-11VI4-0001-SM-5S2OI  
GTEX-1212Z-0002-SM-5SI6W  
GTEX-1269C-0003-SM-5S2PB  
GTEX-12BJ1-0003-SM-5SI6V  
GTEX-12C56-0002-SM-5S2PC  
GTEX-RWS6-0001-SM-3NMAL  
GTEX-S4Q7-0003-SM-3NM8M  
GTEX-S95S-0002-SM-3NM8K  
GTEX-SN8G-0001-SM-3NM8L  
GTEX-T5JC-0001-SM-3NMAK  
GTEX-T5JW-0003-SM-3NMAD  
GTEX-T6MN-0002-SM-3NMAH  
GTEX-T6MO-0003-SM-3NMAG  
GTEX-TKQ1-0003-SM-3NMAE  
GTEX-TML8-0001-SM-3NMAF  
GTEX-U3ZH-0002-SM-3NMDD  
GTEX-U3ZM-0002-SM-3NMDD  
GTEX-U3ZN-0002-SM-3NMDF  
GTEX-UPJH-0001-SM-3NMDE  
GTEX-UPK5-0003-SM-3NMDE  
GTEX-V1D1-0003-SM-3NMDE  
GTEX-VJYA-0001-SM-3NMDJ  
GTEX-VUSG-0003-SM-3NMDK  
GTEX-W5WG-0002-SM-3NMDN  
GTEX-W5X1-0001-SM-3P61V  
GTEX-WFG7-0001-SM-3P61S  
GTEX-WFG8-0001-SM-4LVN8  
GTEX-WFJO-0002-SM-3P61X  
GTEX-WFON-0001-SM-3P61W  
GTEX-WHPG-0004-SM-3NMDO  
GTEX-WHSB-0002-SM-4M1ZR  
GTEX-WOFM-0001-SM-4OOT2  
GTEX-WRHK-0001-SM-4WWDD  
GTEX-WWTW-0002-SM-4MVNH  
GTEX-WXYG-0004-SM-4MVOS  
GTEX-WY7C-0004-SM-4ONDS  
GTEX-WYVS-0004-SM-4ONDT  
GTEX-WZTO-0001-SM-4PQZY  
GTEX-X4LF-0002-SM-4QASG  
GTEX-X5EB-0004-SM-46MWA

GTEX-XBED-0003-SM-47JWP  
GTEX-XBEW-0002-SM-4AT5O  
GTEX-XGQ4-0004-SM-4AT5S  
GTEX-XMK1-0001-SM-4B64F  
GTEX-XPT6-0001-SM-4B64G  
GTEX-XQ3S-0001-SM-4B64K  
GTEX-XXEK-0004-SM-4BRWO  
GTEX-XYKS-0002-SM-4BRWN  
GTEX-Y114-0002-SM-4TT78  
GTEX-Y3IK-0001-SM-4WWE1  
GTEX-Y5LM-0003-SM-4V6G1  
GTEX-Y5V5-0001-SM-4V6FZ  
GTEX-Y5V6-0003-SM-4V6FX  
GTEX-Y8DK-0004-SM-4RGM7  
GTEX-Y8E4-0003-SM-4V6FY  
GTEX-Y9LG-0001-SM-4VBRQ  
GTEX-YB5E-0001-SM-4VDSV  
GTEX-YB5K-0003-SM-4VDSN  
GTEX-YEC3-0002-SM-4W1YI  
GTEX-YEC4-0002-SM-4W1Z6  
GTEX-YF7O-0004-SM-4W1ZT  
GTEX-YFCO-0003-SM-4W21I  
GTEX-ZC5H-0004-SM-4WAXK  
GTEX-ZDTS-0001-SM-4WAXW  
GTEX-ZDTT-0004-SM-4WKG3  
GTEX-ZEX8-0004-SM-4WKFK  
GTEX-ZF29-0002-SM-4WKF2  
GTEX-ZF2S-0004-SM-4WKFE  
GTEX-ZF3C-0001-SM-4WWAW  
GTEX-ZG7Y-0003-SM-4WWEJ  
GTEX-ZLWG-0004-SM-4WWDD5  
GTEX-ZP4G-0003-SM-4WWED  
GTEX-ZPIC-0002-SM-4WWEC  
GTEX-ZPU1-0004-SM-4WWAV  
GTEX-ZQG8-0001-SM-4YCDH  
GTEX-ZQUD-0003-SM-4YCD3  
GTEX-ZT9W-0003-SM-4YCE6  
GTEX-ZT9X-0004-SM-4YCDT  
GTEX-ZTPG-0002-SM-4YCEI  
GTEX-ZUA1-0002-SM-4YCF7  
GTEX-ZV6S-0003-SM-4YCCT  
GTEX-ZV7C-0003-SM-4YCF6  
GTEX-ZVT2-0001-SM-57WCK  
GTEX-ZVTK-0003-SM-51MRV  
GTEX-ZVZP-0004-SM-51MS8

## Cultured fibroblasts

GTEX-111YS-0008-SM-5Q5BH  
GTEX-113JC-0008-SM-5QGR6  
GTEX-117XS-0008-SM-5Q5DQ  
GTEX-1192W-0008-SM-5QGRE  
GTEX-11DXX-0008-SM-5Q5B8  
GTEX-11DXY-0008-SM-5QGR4  
GTEX-11EMC-0008-SM-5Q5DR  
GTEX-11GSP-0008-SM-5Q5DM  
GTEX-11I78-0008-SM-5Q5DI  
GTEX-11LCK-0008-SM-5Q5BB  
GTEX-11NSD-0008-SM-5Q5BC  
GTEX-11NUK-0008-SM-5Q5B9  
GTEX-11NV4-0008-SM-5Q5BA  
GTEX-11O72-0008-SM-5Q5DN  
GTEX-11OC5-0008-SM-5S2OH  
GTEX-11OF3-0008-SM-5S2NH  
GTEX-11ONC-0008-SM-5S2MG  
GTEX-11P7K-0008-SM-5S2O5  
GTEX-11P81-0008-SM-5S2OT  
GTEX-11P82-0008-SM-5S2MS  
GTEX-11PRG-0008-SM-5S2N5  
GTEX-11TT1-0008-SM-5S2P8  
GTEX-11TUW-0008-SM-5SI6S  
GTEX-11WQC-0008-SM-5SI6R  
GTEX-11WQK-0008-SM-5SI6T  
GTEX-11XUK-0008-SM-5S2WD  
GTEX-11ZTS-0008-SM-5S2VC  
GTEX-11ZTT-0008-SM-5S2TZ  
GTEX-11ZUS-0008-SM-5S2UO  
GTEX-1211K-0008-SM-5S2W1  
GTEX-12126-0008-SM-5S2UC  
GTEX-12WSH-0008-SM-5S2V1  
GTEX-12WSM-0008-SM-5S2VD  
GTEX-1399U-0008-SM-5S2VE  
GTEX-N7MS-0008-SM-4E3JI  
GTEX-NFK9-0008-SM-4E3JE  
GTEX-NL3G-0008-SM-4E3JX  
GTEX-O5YT-0008-SM-4E3IQ  
GTEX-O5YW-0008-SM-4E3IE  
GTEX-OHPK-0008-SM-4E3JL  
GTEX-OHPL-0008-SM-4E3I9  
GTEX-OHPM-0008-SM-4E3IP  
GTEX-OHPN-0008-SM-4E3HW  
GTEX-OIZG-0008-SM-4E3J2  
GTEX-OIZI-0008-SM-2XCFD  
GTEX-OOBJ-0008-SM-3NB26  
GTEX-OOBK-0008-SM-3NB27  
GTEX-OXRK-0008-SM-3NB28  
GTEX-T2IS-0008-SM-4DM75  
GTEX-T5JC-0008-SM-4DM6A  
GTEX-U4B1-0008-SM-4DXUW  
GTEX-U8T8-0008-SM-4DXSP  
GTEX-UJHI-0008-SM-4IHL1  
GTEX-UJMC-0008-SM-4IHKK  
GTEX-UPK5-0008-SM-4IHJD  
GTEX-V1D1-0008-SM-4JBIJ  
GTEX-W5X1-0008-SM-4LMKA  
GTEX-WFG7-0008-SM-4LMKB  
GTEX-WHPG-0008-SM-4M1ZQ  
GTEX-WHSB-0008-SM-4M1ZP  
GTEX-WHWD-0008-SM-4OOSU  
GTEX-WI4N-0008-SM-4OOSV  
GTEX-WL46-0008-SM-4OOSW  
GTEX-WQUQ-0008-SM-4OOT1  
GTEX-WRHU-0008-SM-4MVPB  
GTEX-WVJS-0008-SM-4MVPC  
GTEX-WVLH-0008-SM-4MVPD  
GTEX-WY7C-0008-SM-4ONDW  
GTEX-WYBS-0008-SM-4ONDX  
GTEX-WYJK-0008-SM-4ONDV  
GTEX-WYVS-0008-SM-4ONDY  
GTEX-WZTO-0008-SM-4PQZZ  
GTEX-X15G-0008-SM-4PR2D  
GTEX-X3Y1-0008-SM-4PR12  
GTEX-X4LF-0008-SM-4QAST  
GTEX-XBEC-0008-SM-4AT3X  
GTEX-XBEW-0008-SM-4AT3Y  
GTEX-XMD2-0008-SM-4WWE7  
GTEX-XMD3-0008-SM-4AT4V  
GTEX-XMK1-0008-SM-4GICF  
GTEX-XOT4-0008-SM-4B664  
GTEX-XPT6-0008-SM-4B64Q  
GTEX-XPVG-0008-SM-4GICH  
GTEX-XQ3S-0008-SM-4GIDZ  
GTEX-XUW1-0008-SM-4BOQH  
GTEX-XV7Q-0008-SM-4BRWL  
GTEX-Y8E4-0008-SM-4V6FW  
GTEX-Y9LG-0008-SM-4VBRJ  
GTEX-YB5K-0008-SM-4VDT8  
GTEX-YEC4-0008-SM-4W1YR  
GTEX-YF7O-0008-SM-4W1ZS  
GTEX-YJ89-0008-SM-4RGM4  
GTEX-Z93S-0008-SM-4RGM5  
GTEX-ZC5H-0008-SM-4WAX8  
GTEX-ZDTS-0008-SM-4E3I8  
GTEX-ZDTT-0008-SM-4E3K5

GTEX-OXRL-0008-SM-3NB29  
GTEX-P4PP-0008-SM-48TDV  
GTEX-P4QT-0008-SM-48TDZ  
GTEX-PSDG-0008-SM-48TE5  
GTEX-PW2O-0008-SM-48TEB  
GTEX-PWCY-0008-SM-48TE9  
GTEX-PX3G-0008-SM-48U2L  
GTEX-Q2AH-0008-SM-48U2J  
GTEX-QCQG-0008-SM-48U2G  
GTEX-QLQ7-0008-SM-447AW  
GTEX-QXCU-0008-SM-48FCH  
GTEX-R45C-0008-SM-48FF2  
GTEX-R55C-0008-SM-48FCF  
GTEX-R55D-0008-SM-48FEV  
GTEX-R55E-0008-SM-48FCG  
GTEX-R55G-0008-SM-48FEX  
GTEX-RM2N-0008-SM-48FF3  
GTEX-RN64-0008-SM-48FEZ  
GTEX-RNOR-0008-SM-48FEY  
GTEX-RU1J-0008-SM-46MV9  
GTEX-RU72-0008-SM-46MV8  
GTEX-RWS6-0008-SM-47JYV  
GTEX-RWSA-0008-SM-47JYX  
GTEX-S33H-0008-SM-4AD6C  
GTEX-S4Z8-0008-SM-33HAZ  
GTEX-SE5C-0008-SM-4B64J  
GTEX-SJXC-0008-SM-4DM7G

GTEX-ZDXO-0008-SM-4E3HR  
GTEX-ZDYS-0008-SM-4E3IX  
GTEX-ZE7O-0008-SM-4E3JQ  
GTEX-ZEX8-0008-SM-4E3JU  
GTEX-ZF2S-0008-SM-4E3IK  
GTEX-ZF3C-0008-SM-4E3IL  
GTEX-ZLWG-0008-SM-4E3J4  
GTEX-ZP4G-0008-SM-4E3I4  
GTEX-ZPIC-0008-SM-4E3JF  
GTEX-ZPU1-0008-SM-4E3IR  
GTEX-ZQG8-0008-SM-4E3J9  
GTEX-ZQUD-0008-SM-4YCCU  
GTEX-ZT9W-0008-SM-4YCDJ  
GTEX-ZT9X-0008-SM-4YCD7  
GTEX-ZTPG-0008-SM-4YCEK  
GTEX-ZTX8-0008-SM-4YCDV  
GTEX-ZUA1-0008-SM-4YCEW  
GTEX-ZV68-0008-SM-4YCCV  
GTEX-ZV6S-0008-SM-4YCF9  
GTEX-ZV7C-0008-SM-57WCL  
GTEX-ZVE2-0008-SM-51MRU  
GTEX-ZVP2-0008-SM-51MSL  
GTEX-ZVT2-0008-SM-57WC9  
GTEX-ZVT3-0008-SM-51MRI  
GTEX-ZVTK-0008-SM-57WDA  
GTEX-ZVZP-0008-SM-51MSX  
GTEX-ZXES-0008-SM-57WCX

## References

1. Cummings BB, Marshall JL, Tukiainen T, Lek M, Donkervoort S, Foley AR, et al. Improving genetic diagnosis in Mendelian disease with transcriptome sequencing. *Sci Transl Med.* 2017;9(386).
2. Jaganathan K, Kyriazopoulou Panagiotopoulou S, McRae JF, Darbandi SF, Knowles D, Li YI, et al. Predicting Splicing from Primary Sequence with Deep Learning. *Cell.* 2019;176(3):535-48.e24.
